# Supplementary material for: Are Nonsynonymous Transversions Generally More Deleterious than Nonsynonymous Transitions?
Source: PubMed Central journal article supplement — Mol Biol Evol. 2020 Aug 17;38(1):181–91. doi: 10.1093/molbev/msaa200 (PMC7783172; doi:10.1093/molbev/msaa200), 2020-08-17
Supplement: msaa200_supplementary_data.pdf [file msaa200_supplementary_data.pdf]

Supplementary materials for

“Are nonsynonymous transversions generally more deleterious than nonsynonymous transitions?”

Z. Zou and J. Zhang ([jjanzhi@umich.edu](mailto:jjanzhi@umich.edu))

The supplementary materials include:  
Legends of supplementary figures  
Figures S1-S8  
Table S1

## Legends of supplementary figures

**Fig. S1.** Correlations between the estimated  $\eta$  and estimated (a) transition bias at the mutational level ( $\kappa$ ), (b) fixation probability of nonsynonymous transversions relative to that of synonymous transversions ( $\omega$ ), and (c) genetic distance ( $d$ ) in the 90 clades sampled across the tree of life. Spearman's correlation coefficient  $\rho$  and associated  $P$ -value are shown in each panel.

**Fig. S2.** Estimated  $\eta$ 's show minor deviations from the true values in simulations under Eq. (1) with among-site  $\omega$  variation, under different values of (a) genetic distance ( $d$ ), (b) transition bias at the mutational level ( $\kappa$ ), and (c) the fixation probability of nonsynonymous transversions relative to that of synonymous transversions (mean  $\omega$ ), or (d) with among-site variations in both  $\omega$  and equilibrium frequencies  $\pi$ . In (a)-(c), only the gamma shape parameter  $\alpha$  of the among-site  $\omega$  variation varied, as shown on the  $x$ -axis. In (d), only the mean  $\omega$  varied. In all panels, each dot is one  $\eta$  estimate plotted against the  $\alpha$  or mean  $\omega$  used in the simulation. The true value of an  $\eta$  estimate is indicated by its color, and the dotted lines correspond to the true  $\eta$  values for easy comparison. In each plot, except for the parameter varied, the other parameters used in the simulation are  $d = 1$ ,  $\kappa = 2$ , mean  $\omega = 0.06$ , and  $\alpha = 1$ .

**Fig. S3.** Even in the presence of among-site  $\omega$  variation, variations in  $\kappa$ ,  $\omega_0$ ,  $\pi$ ,  $d$ , or their combination are insufficient to explain the observed large among-clade variation in the estimated  $\eta$ . Here,  $\eta$ 's estimated from sequence alignments simulated under Eq. (2) are plotted against the true values of (a)  $\kappa$ , (b)  $\omega_0$ , (c)  $\pi$ , (d)  $d$ , or (e) combination of  $\kappa$ ,  $\omega_0$ ,  $\pi$ , and  $d$  used in the simulation. In (a), (b), and (d), only the parameter on the  $x$ -axis varied in the simulations. In (c) and (e), the observed codon frequencies and combination of  $\kappa$ ,  $\omega_0$ ,  $\pi$ , and  $d$  of the 90 clades are respectively used in the simulations, and the insets plot the  $\eta$  estimated from the real sequence alignment of each clade against that estimated from the simulated alignment. For each parameter value, the  $\eta$  estimates from 10 replicate simulations are shown as dots (in panels a, b, and d) or boxplots (in panels c and e). In each boxplot, the lower and upper edges of a box represent the first ( $qu_1$ ) and third ( $qu_3$ ) quartiles, respectively, the horizontal line inside the box indicates the median ( $md$ ), and the whiskers extend to the most extreme values inside inner fences,  $md \pm 1.5(qu_3 - qu_1)$ . In the insets of panels (c) and (e), the mean estimate from the 10 replicate

simulations is shown on the  $y$ -axis. In each plot, except for the parameter(s) varied, the other parameters used in the simulation are  $d = 1$ ,  $\kappa = 2$ ,  $\omega_0 = 0.06$ , and  $\alpha = 1$ .

**Fig. S4.** In the presence of among-site  $\omega$  variation, variation of relative amino acid exchangeabilities (REs) among clades can still explain the observed  $\eta$  variation. **(a)** Simulations with RE values derived from the Grantham matrix (see Materials and Methods). For each of the 10 new RE sets at a given level of deviation from or shuffled from the original values, five replicate sequence evolution simulations are conducted and the corresponding  $\eta$  estimates are plotted. Different RE sets at each deviation level and from each independent shuffle are distinguished by different (randomly assigned) colors. **(b)** The  $\eta$ 's estimated from the 90 clades simulated using the corresponding RE values of the real clades are plotted against the  $\eta$ 's estimated from the real clades. Dots are colored by the corresponding taxonomic group of the clades, as shown in the legend. The dashed red line indicates  $y = x$ . The  $y$ -axis value of each dot is the mean estimate from 10 replicate simulations.

**Fig. S5.** The observed  $\eta$  variation among clades cannot be caused primarily by mutational biases unconsidered in  $\eta$  inference. Shown are comparisons between  $\eta$ 's estimated from real data and those estimated from data simulated using mutational biases of the real data, when the simulation is performed in the **(a)** absence or **(b)** presence of among-site  $\omega$  variation. The gamma shape parameter for  $\omega$  variation in **(b)** is 1. Mutational bias is estimated from four-fold degenerate sites of the real data for each clade using a General-Reverse-Time model. The dashed red line indicates  $y = x$ . The  $y$ -axis value of each dot is the mean estimate from 10 replicate simulations.

**Fig. S6.** Synonymous ( $\kappa$ ) and nonsynonymous ( $\kappa\eta$ ) transition biases for each of the 90 clades, estimated under Eq. (1) (modified Goldman-Yang model; blue dots) or Eq. (4) (modified FMutSel model; orange dots).

**Fig. S7.** The  $\eta$  values of the 90 clades estimated under Eq. (4) (modified FMutSel model) correlate well with those estimated under Eq. (1) (modified Goldman-Yang model). The red line indicates  $y = x$ .

**Fig. S8.** The RE estimator of Zou and Zhang (2019) is robust to the violation of the assumption of no selection on synonymous mutations. We simulated 90 clades according to a modified version of the FMutSel model with the RE terms incorporated into the transition rates of corresponding codon changes, using REs estimated by Zou and Zhang (2019) and  $F$  estimated in the present study from the real data of the 90 clades. We then estimated REs using the method of Zou and Zhang (2019). Shown are the frequency distributions of (A) Pearson and (B) Spearman correlations between the true REs used in the simulation and the estimated REs from the simulated data for the 90 clades simulated.

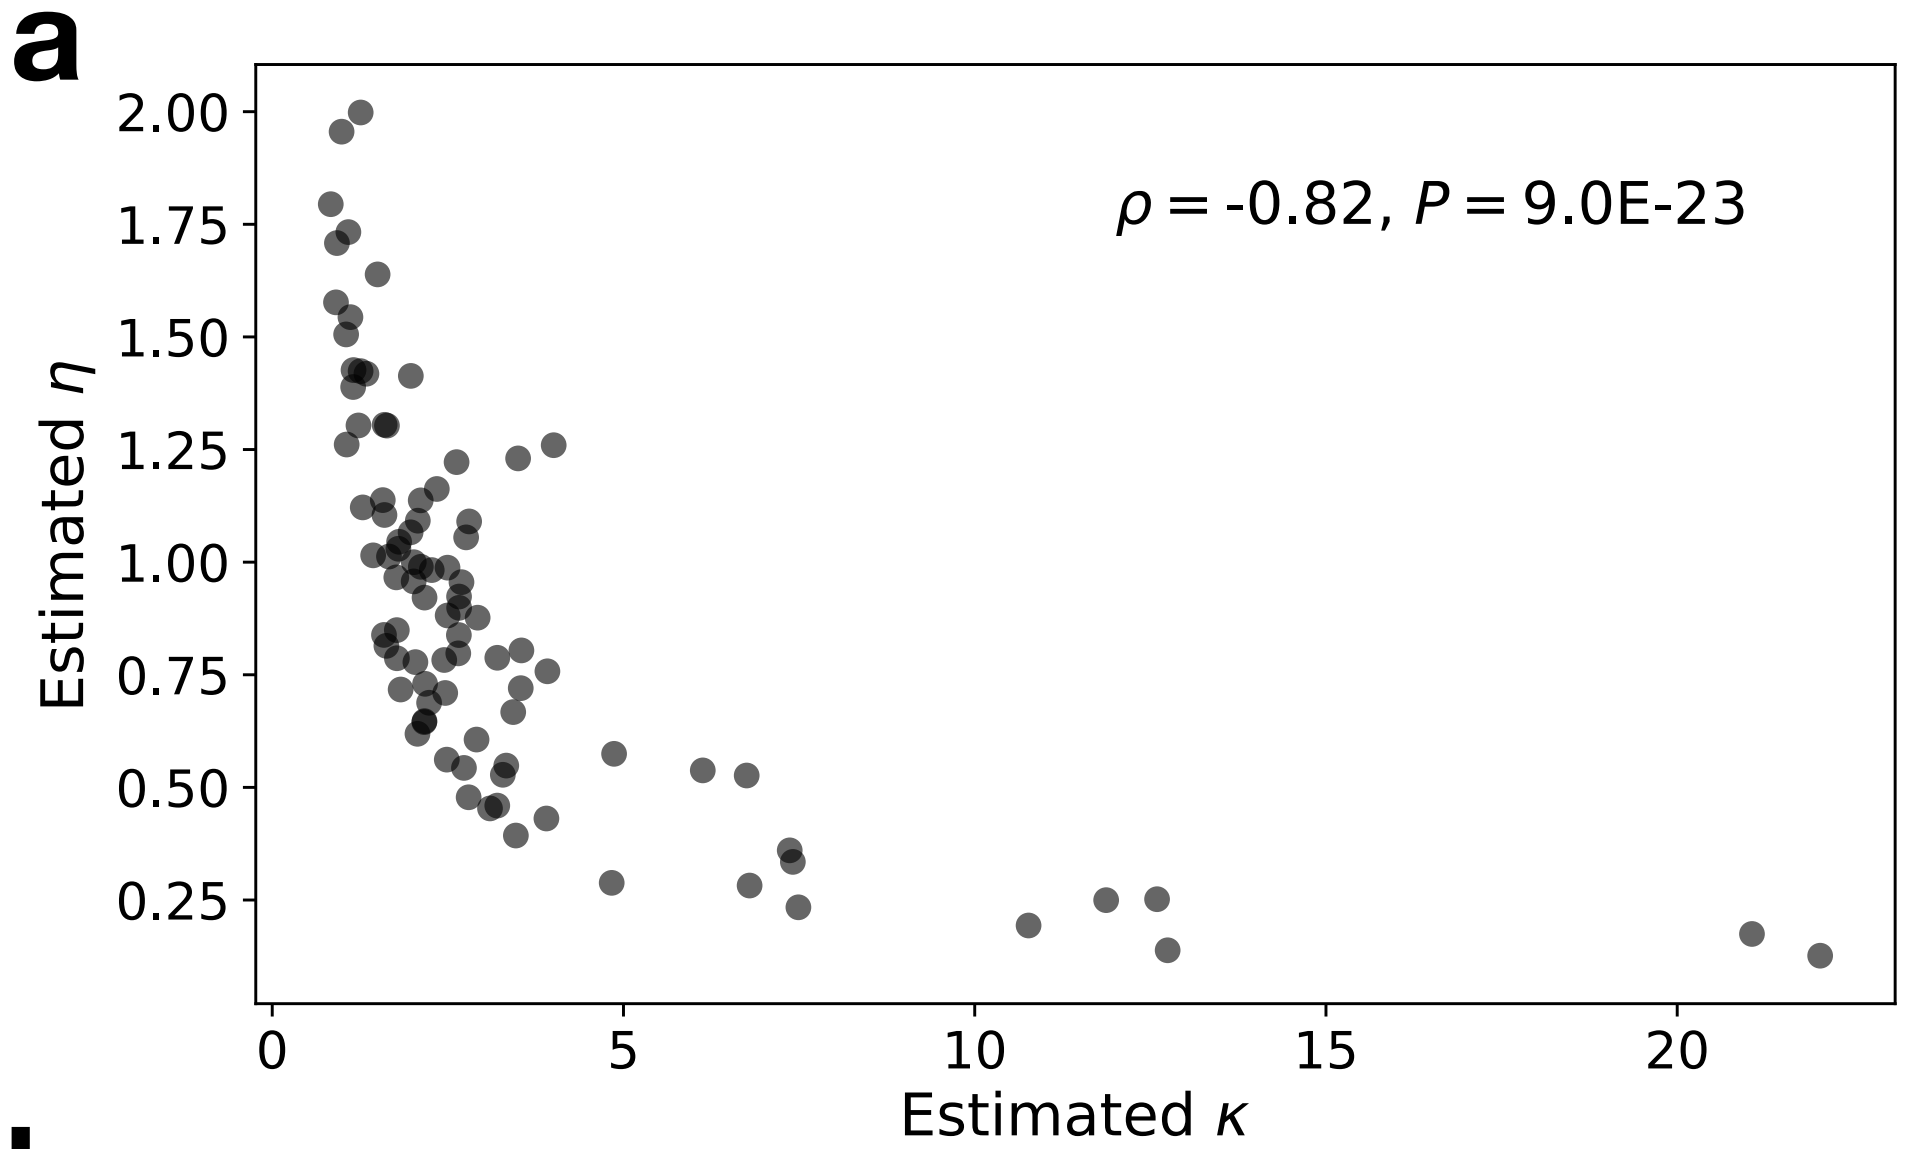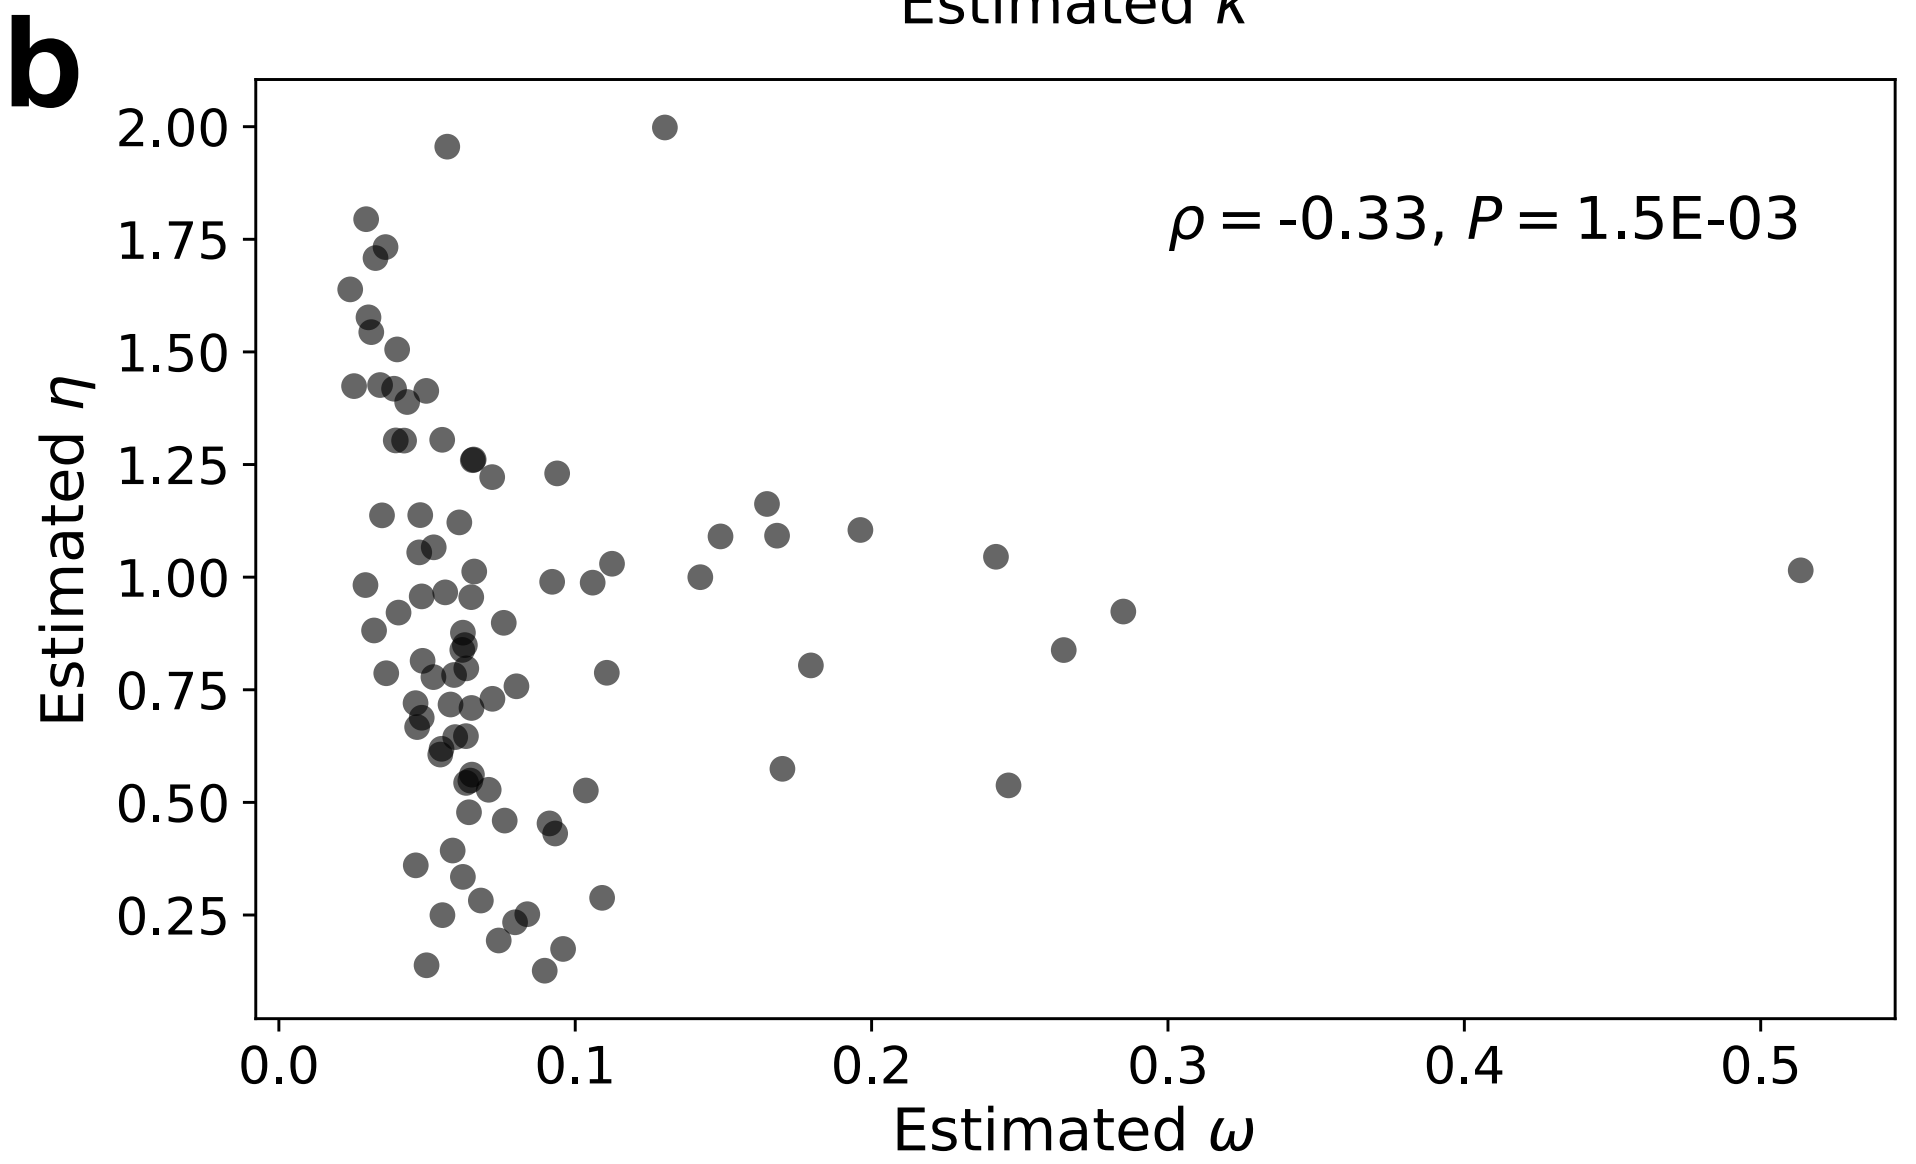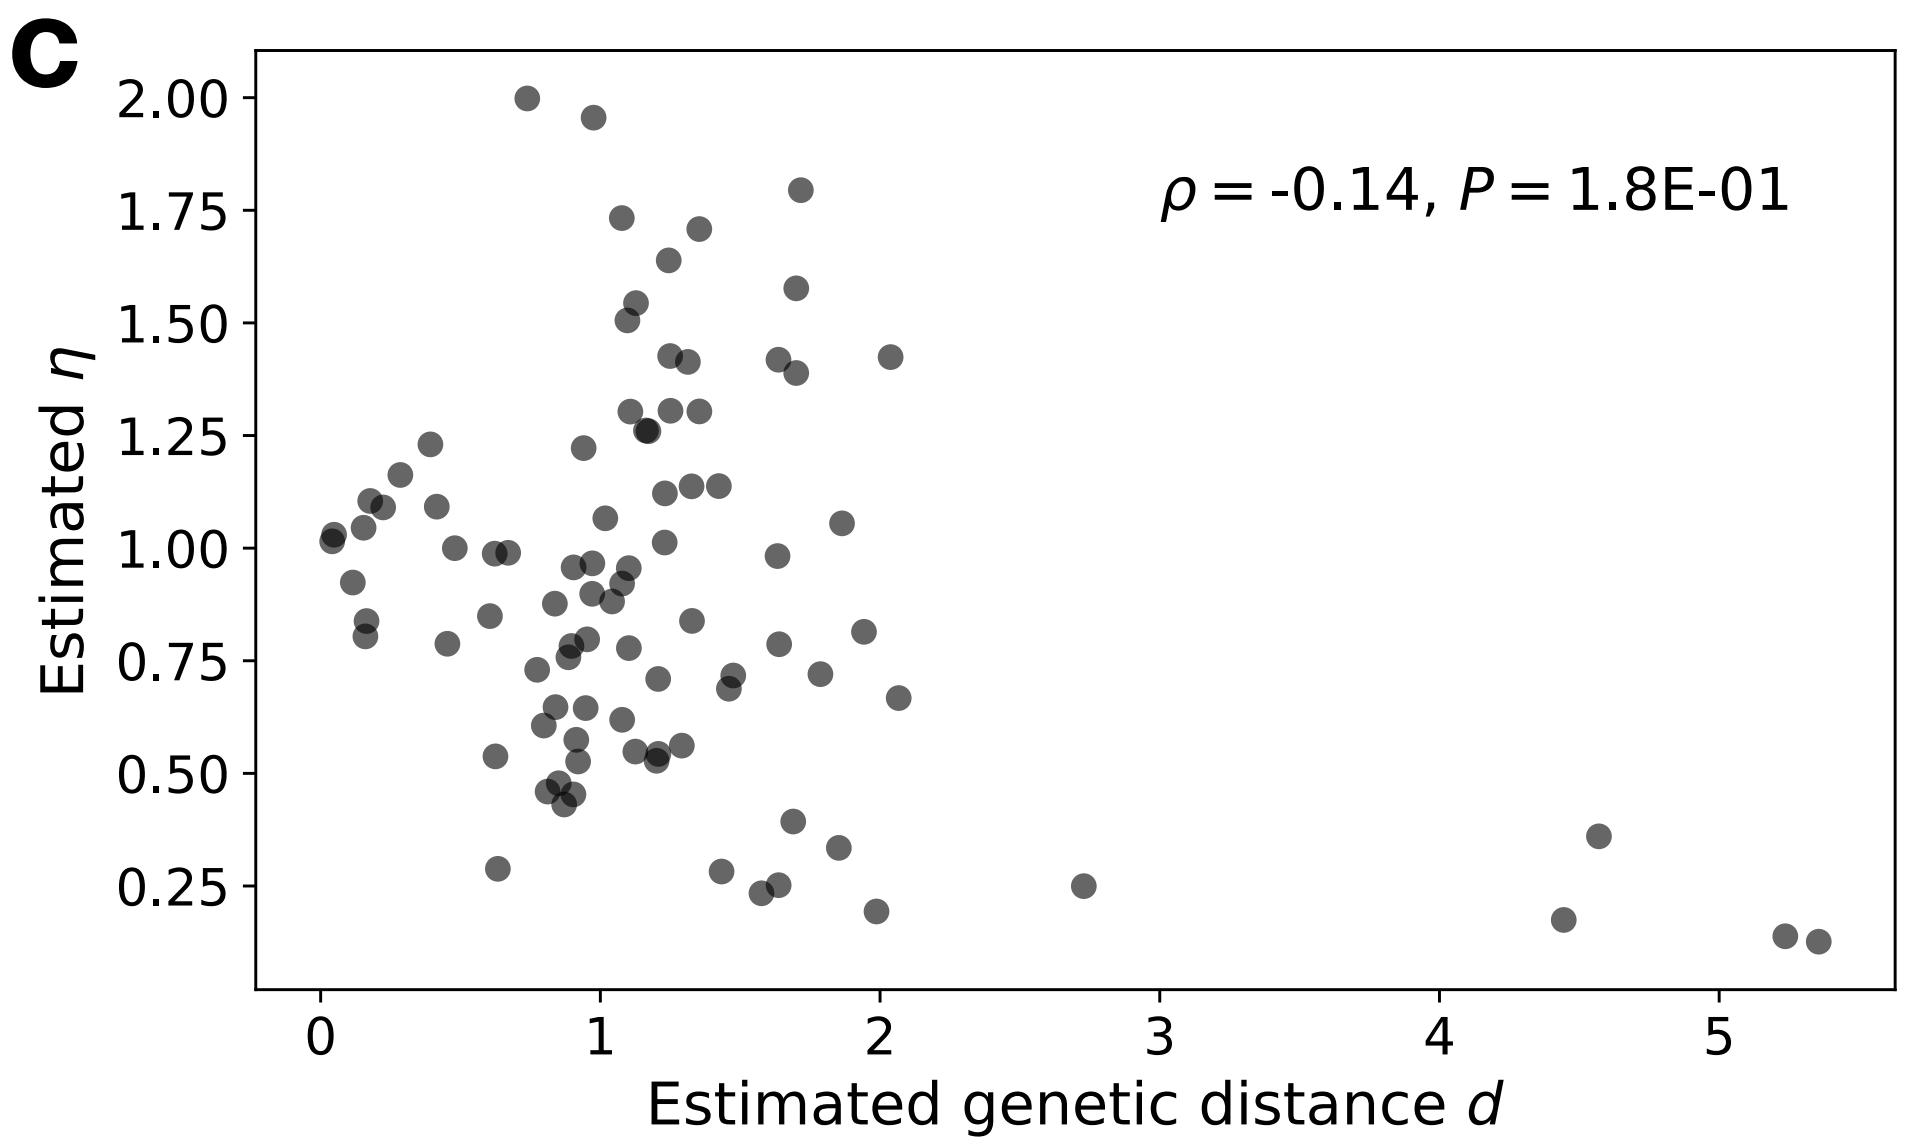

**Figure S1**

**a**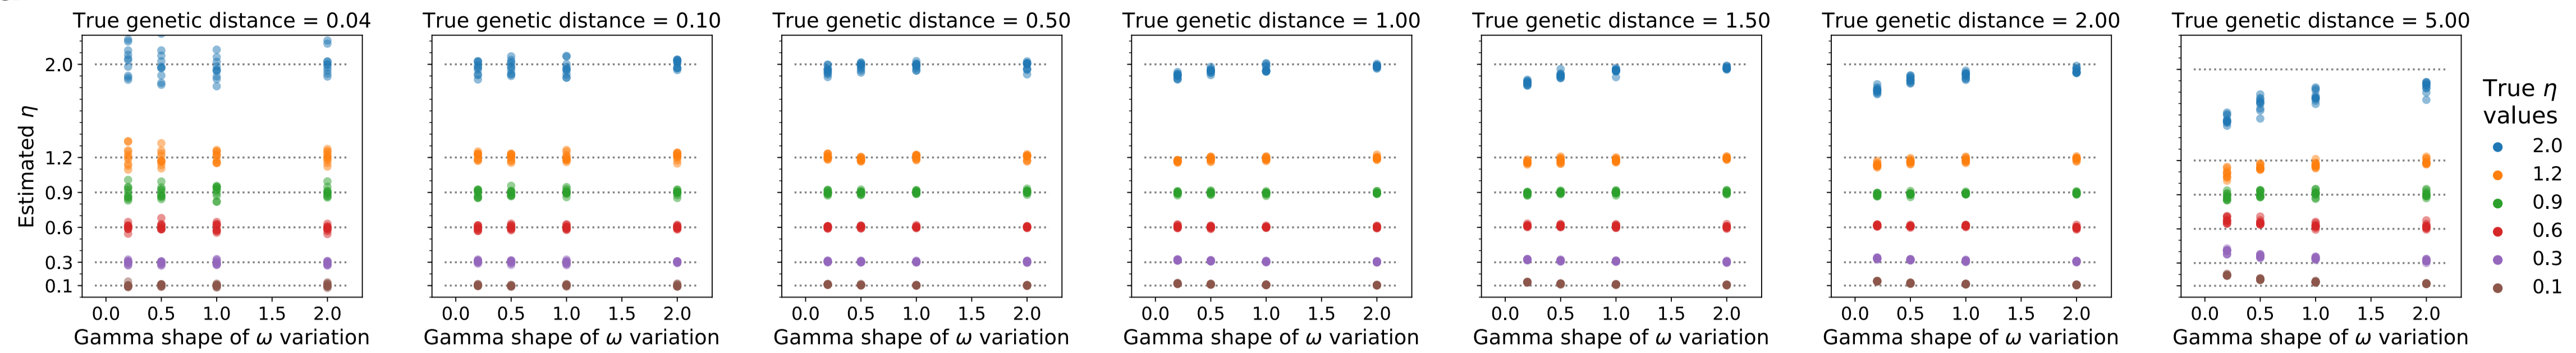**b**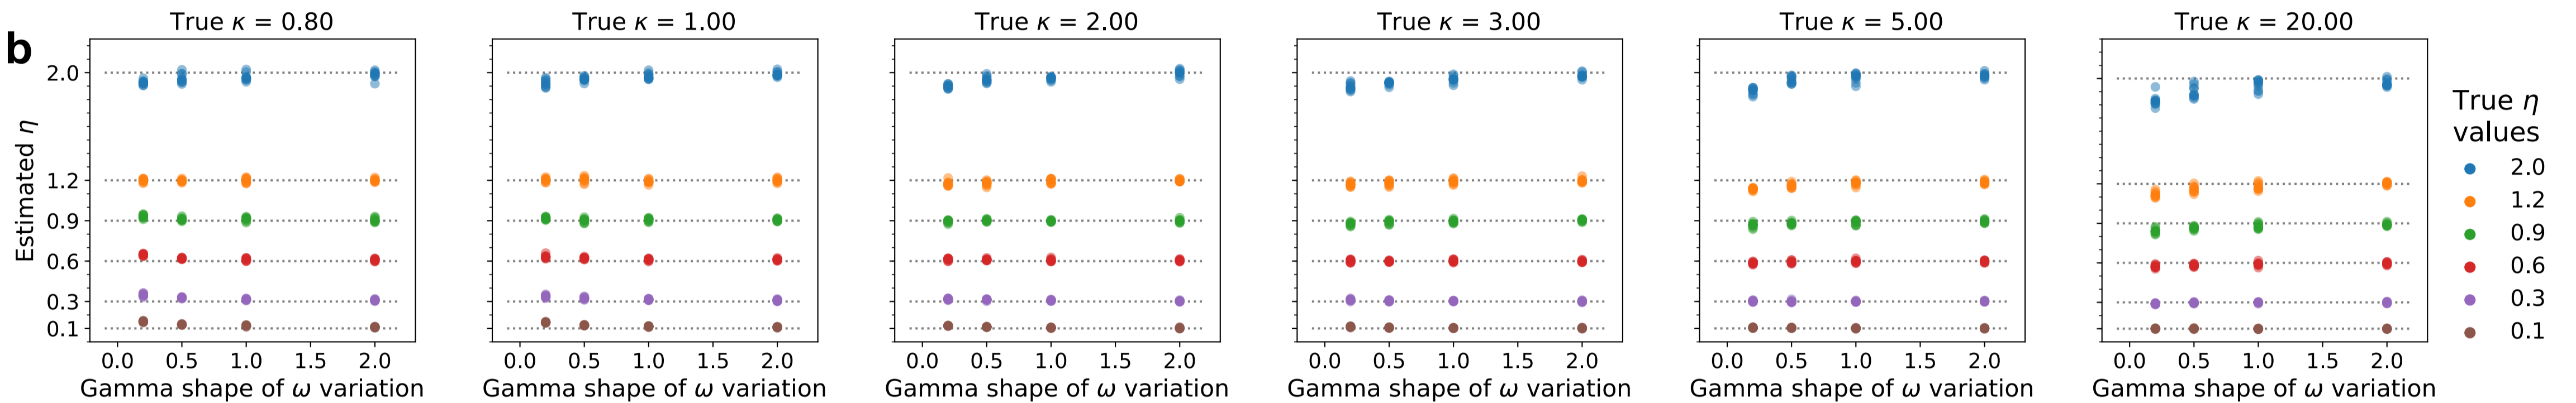**c**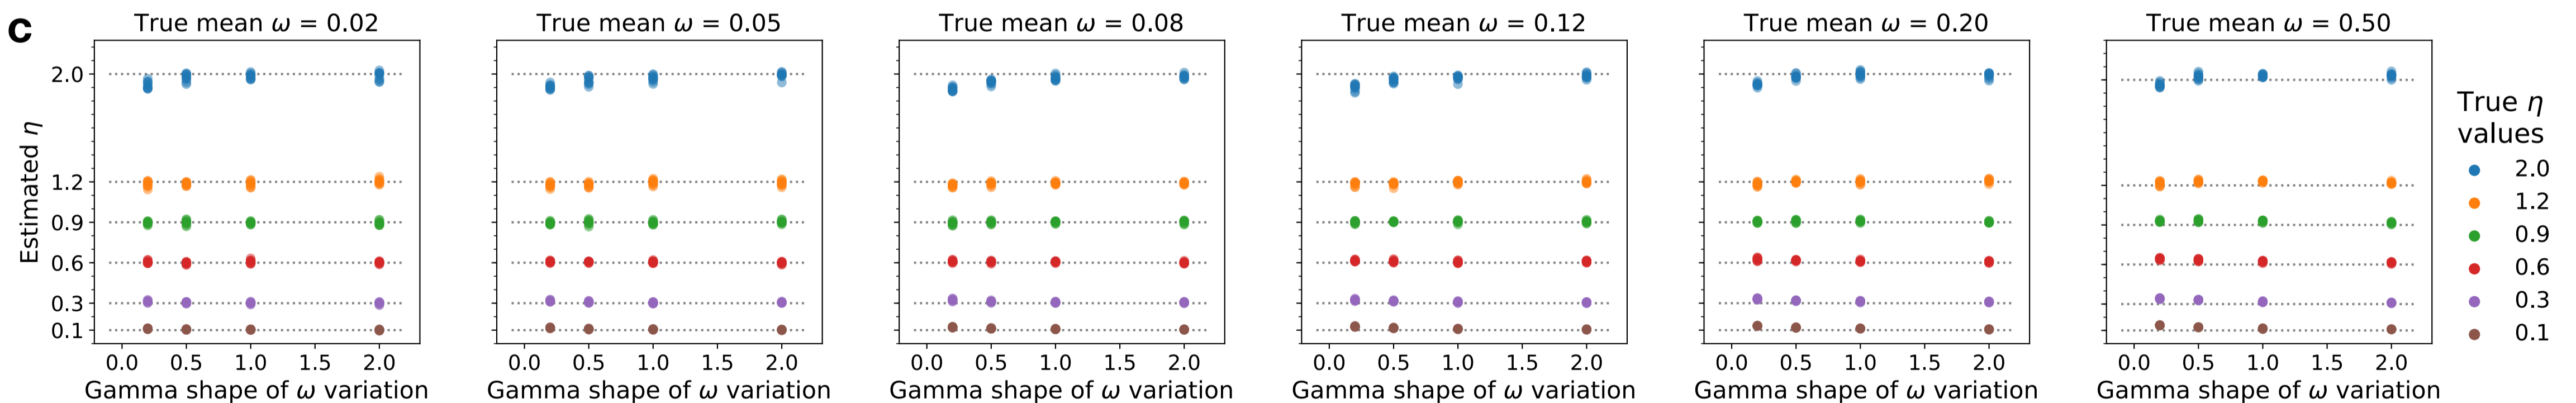**d**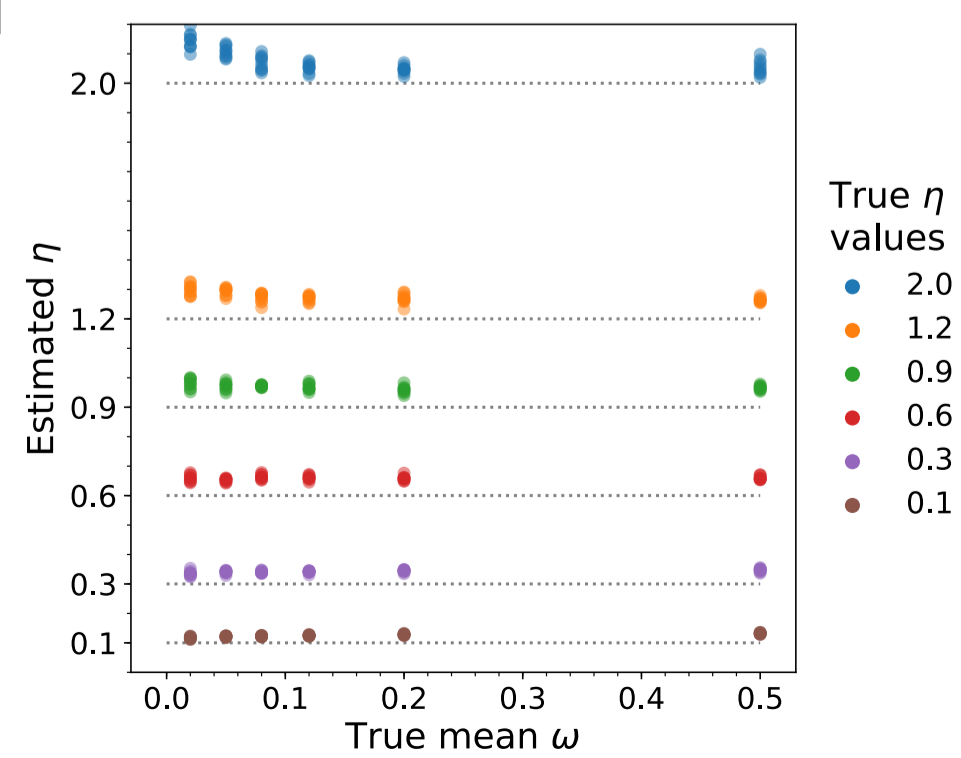**Figure S2**

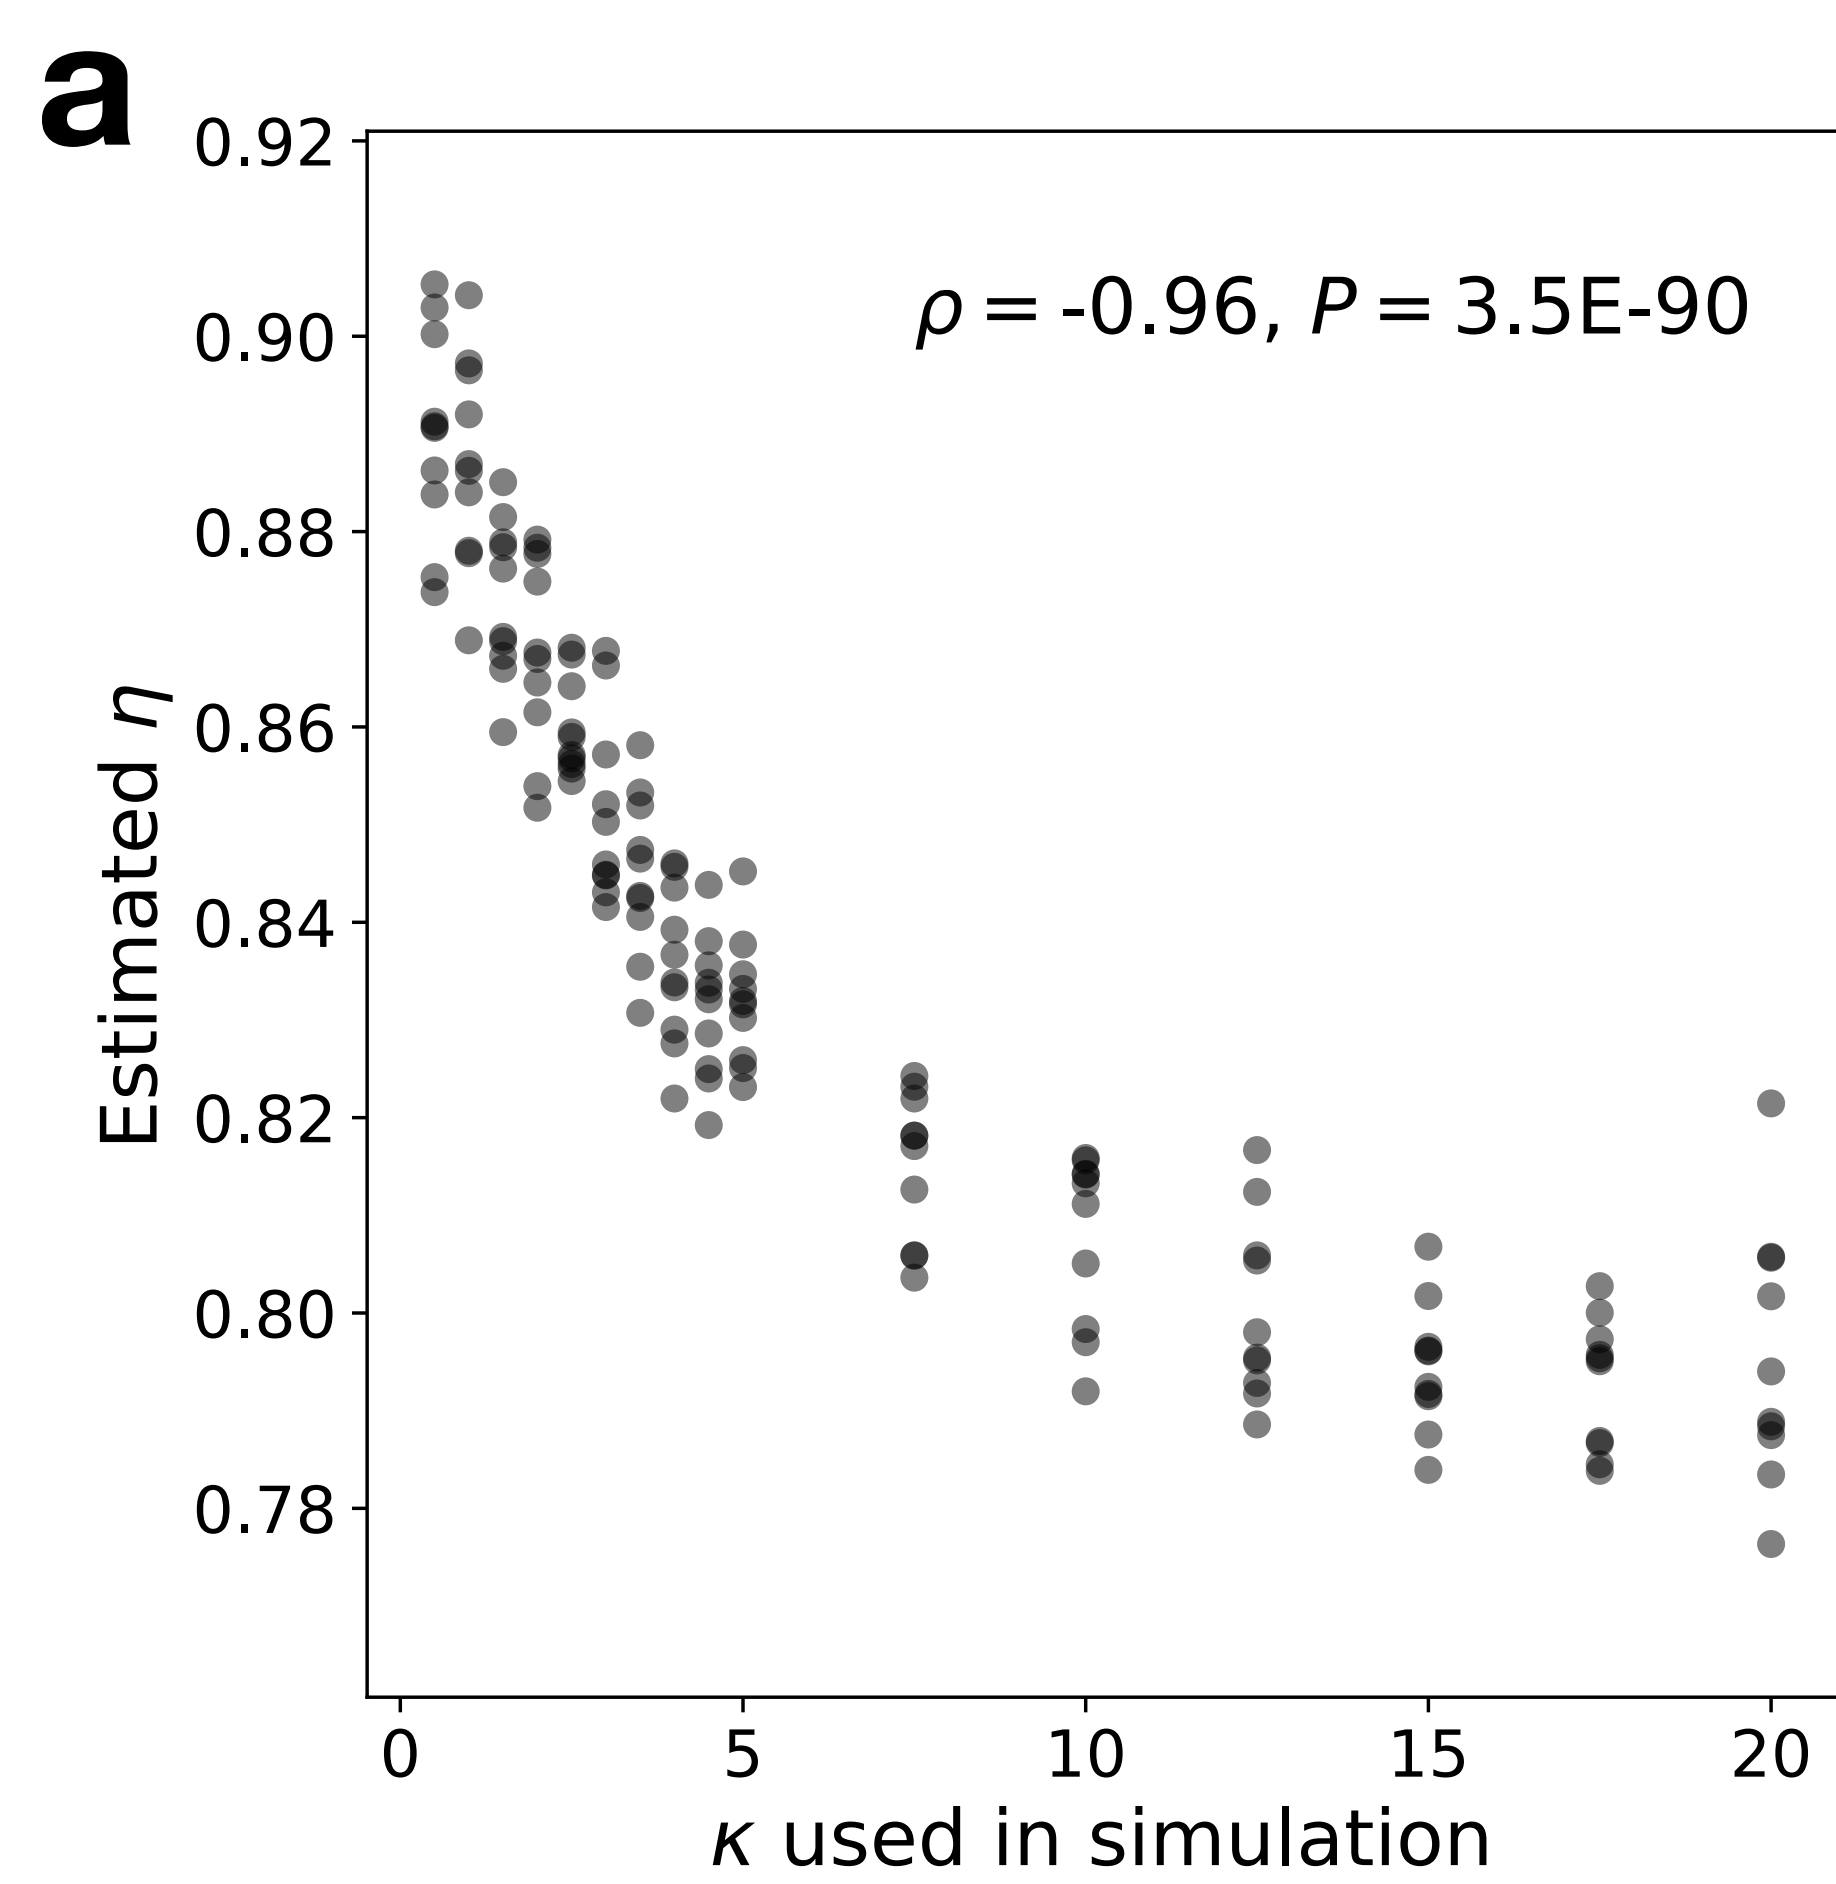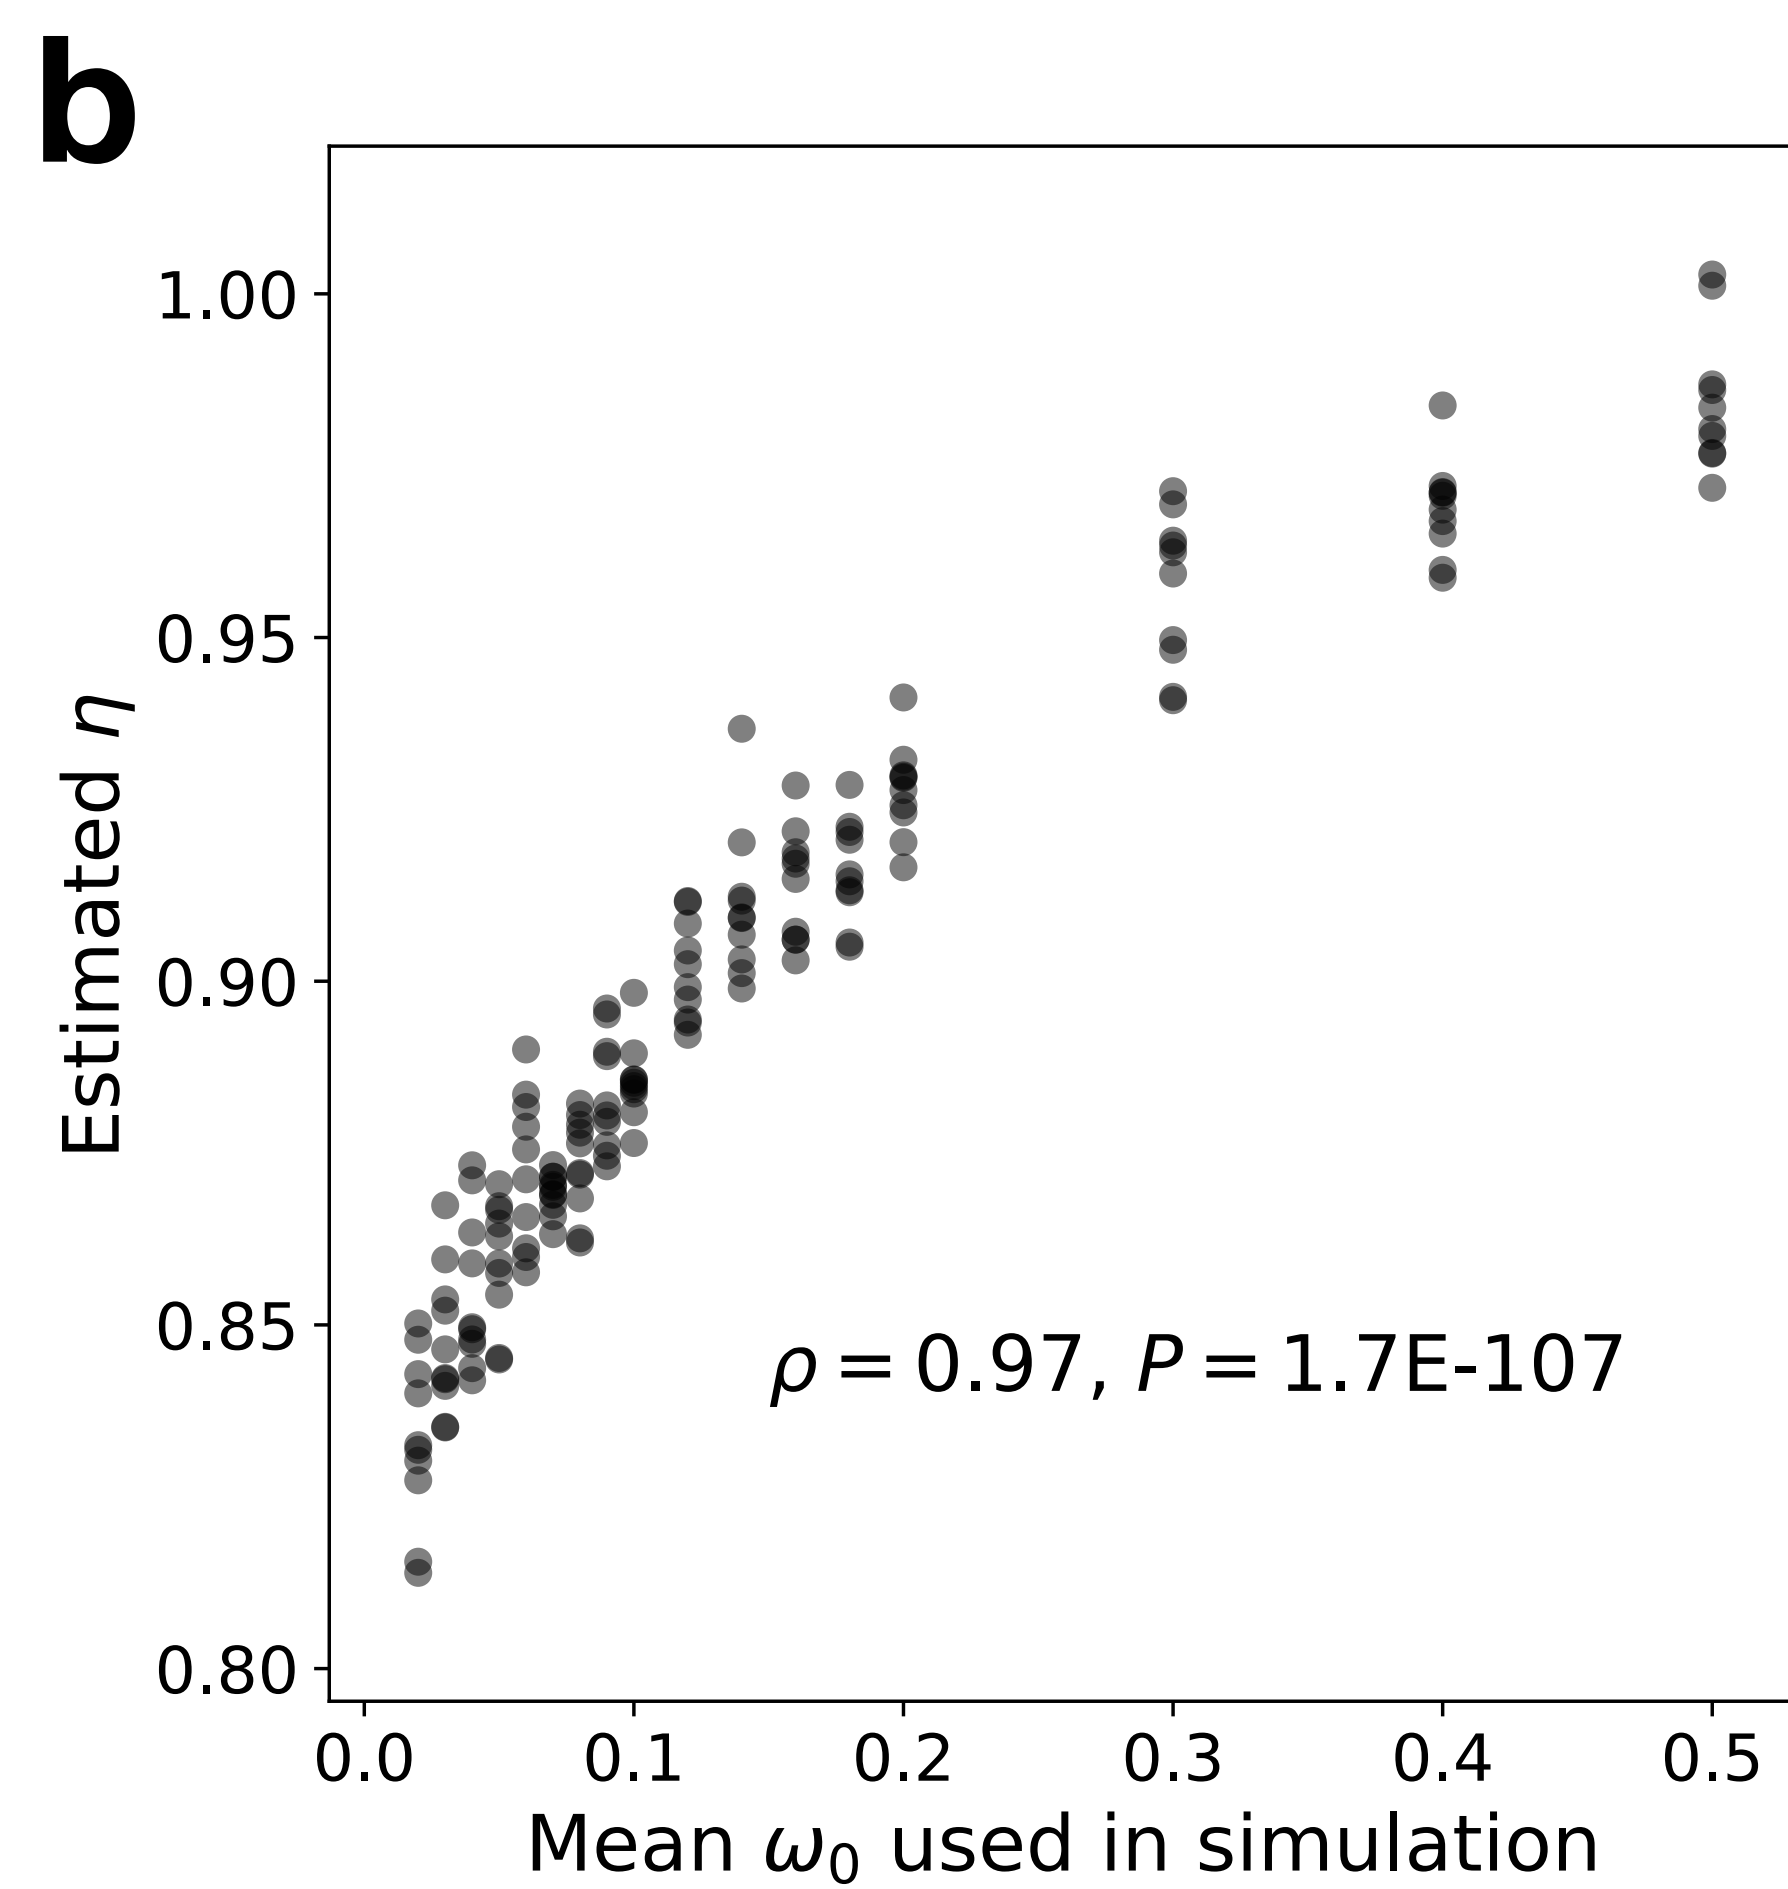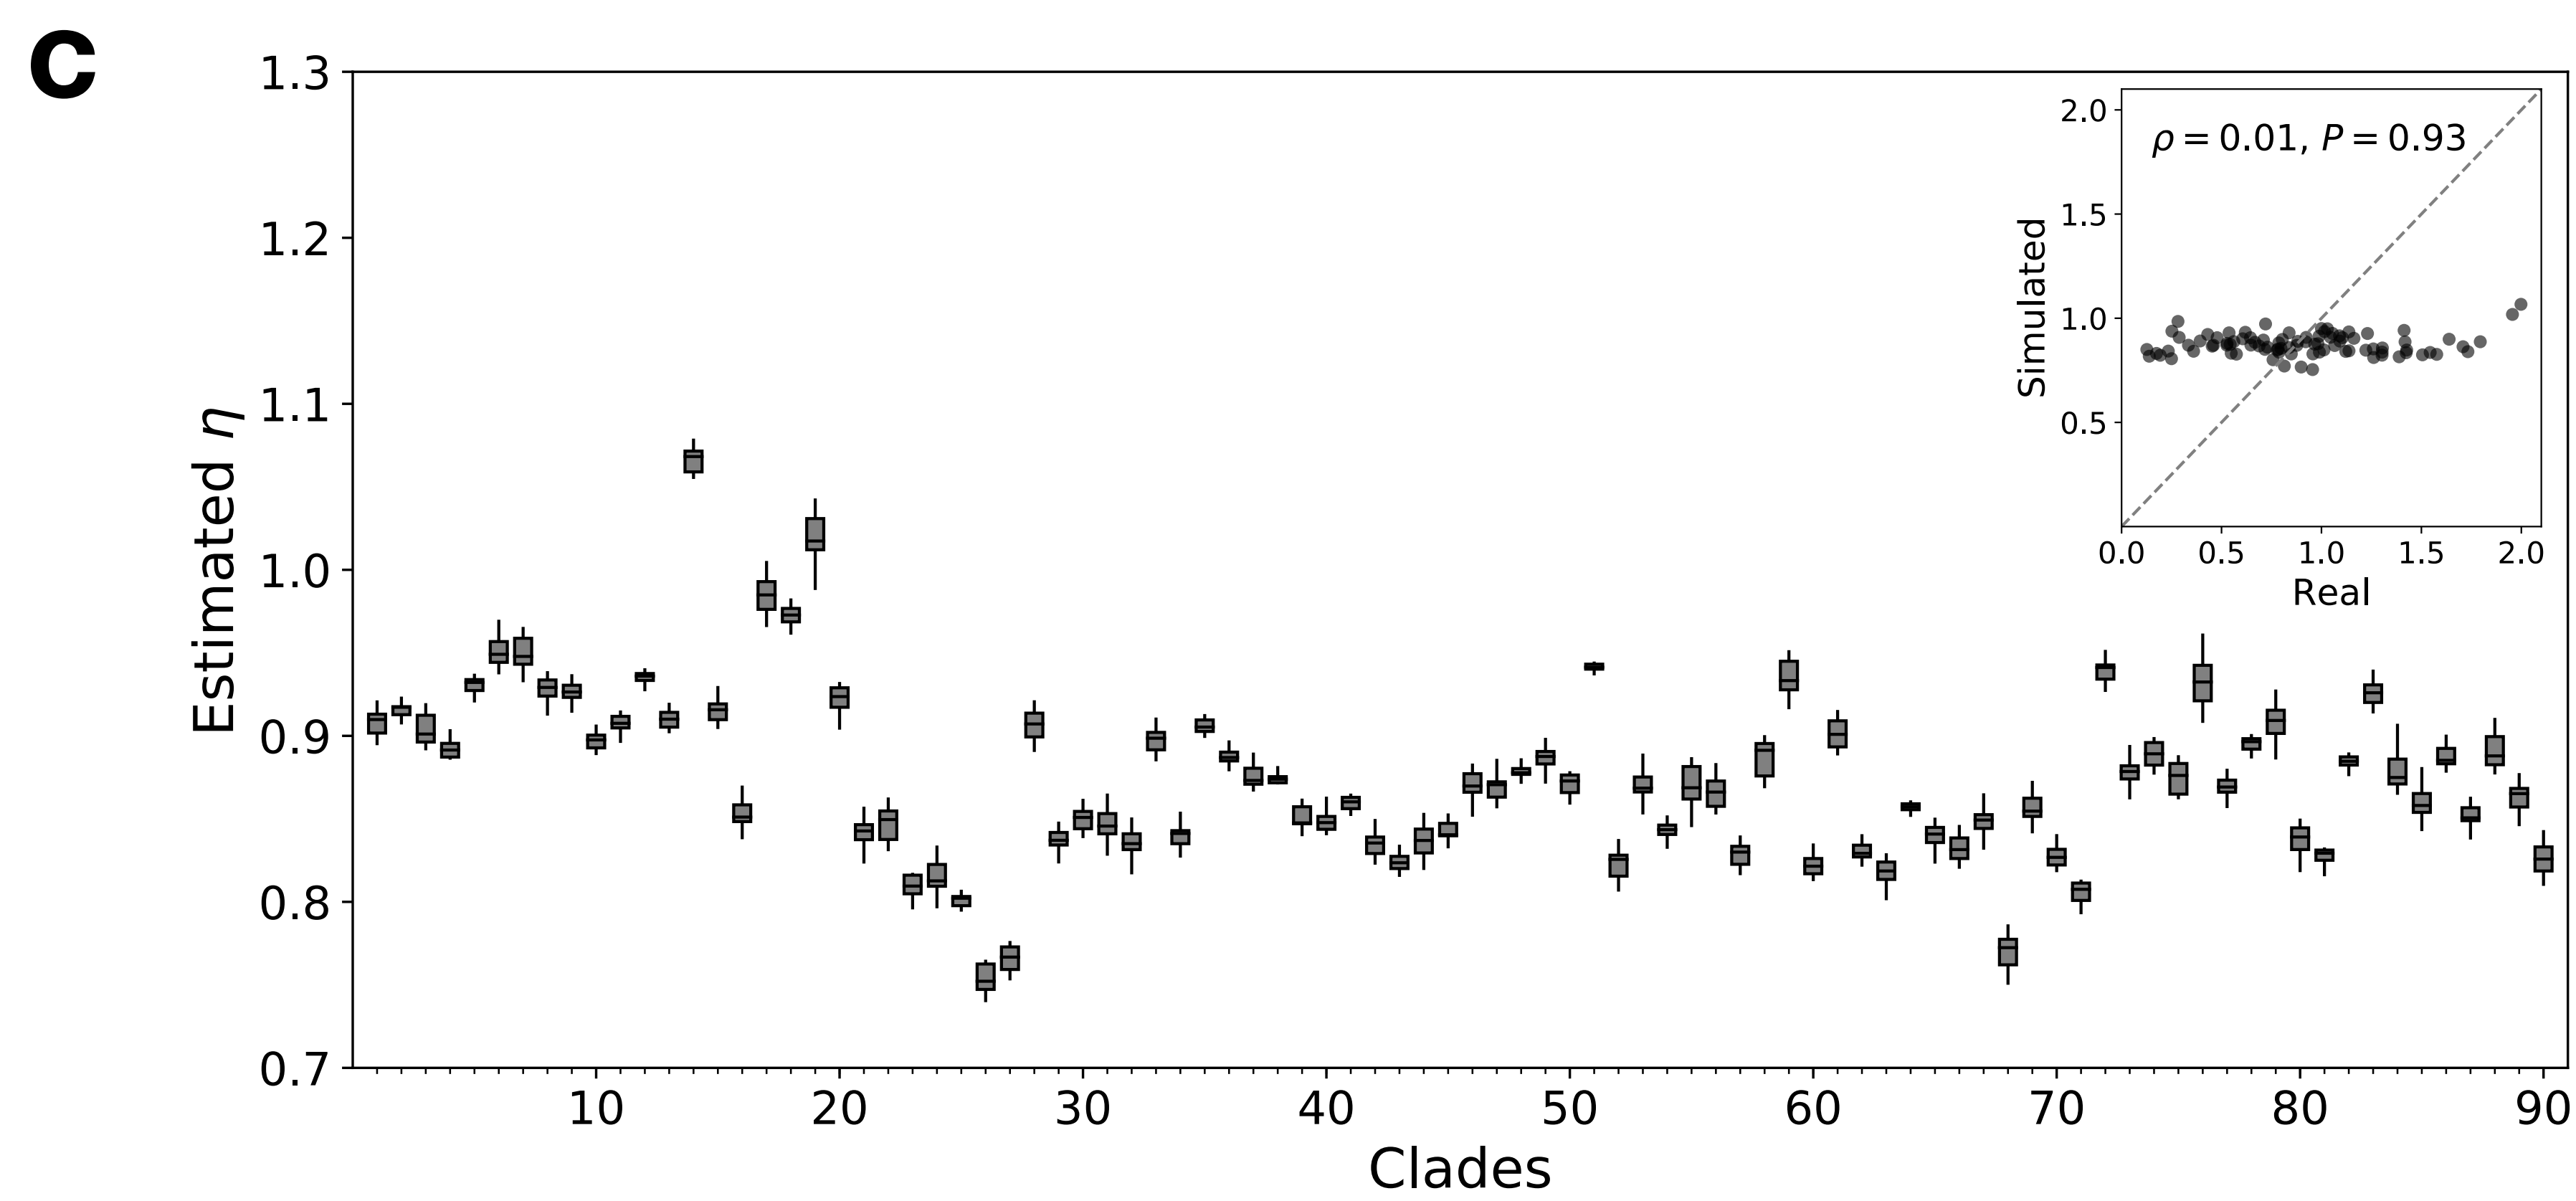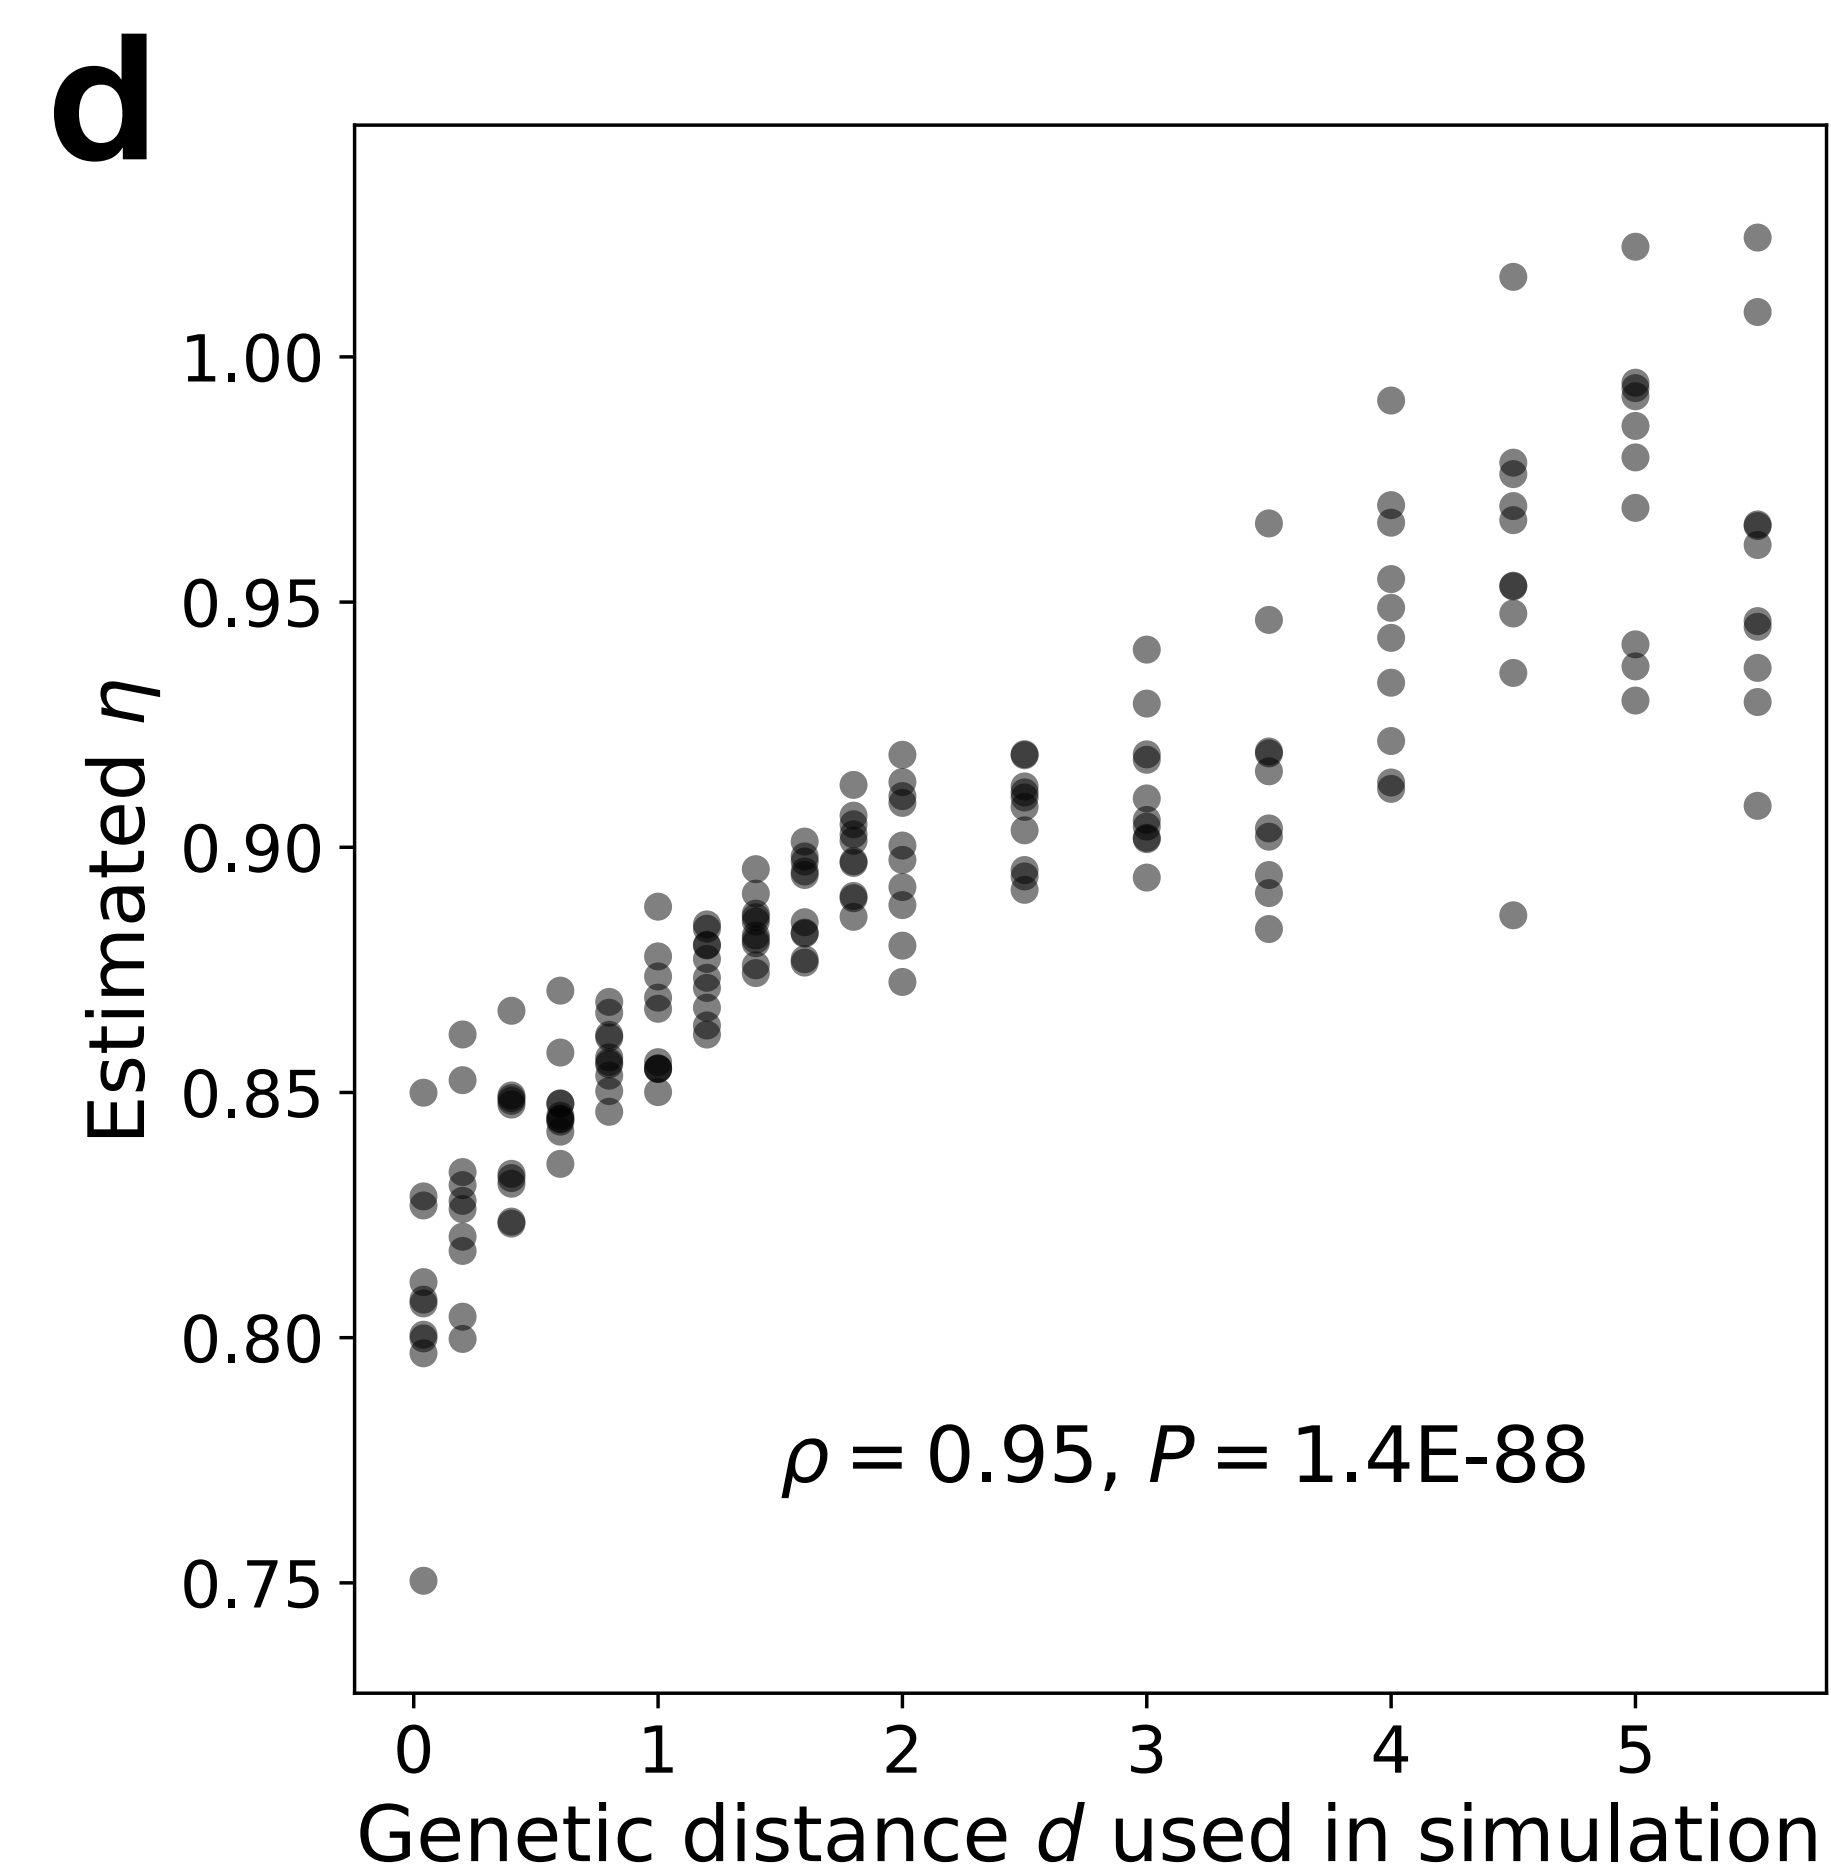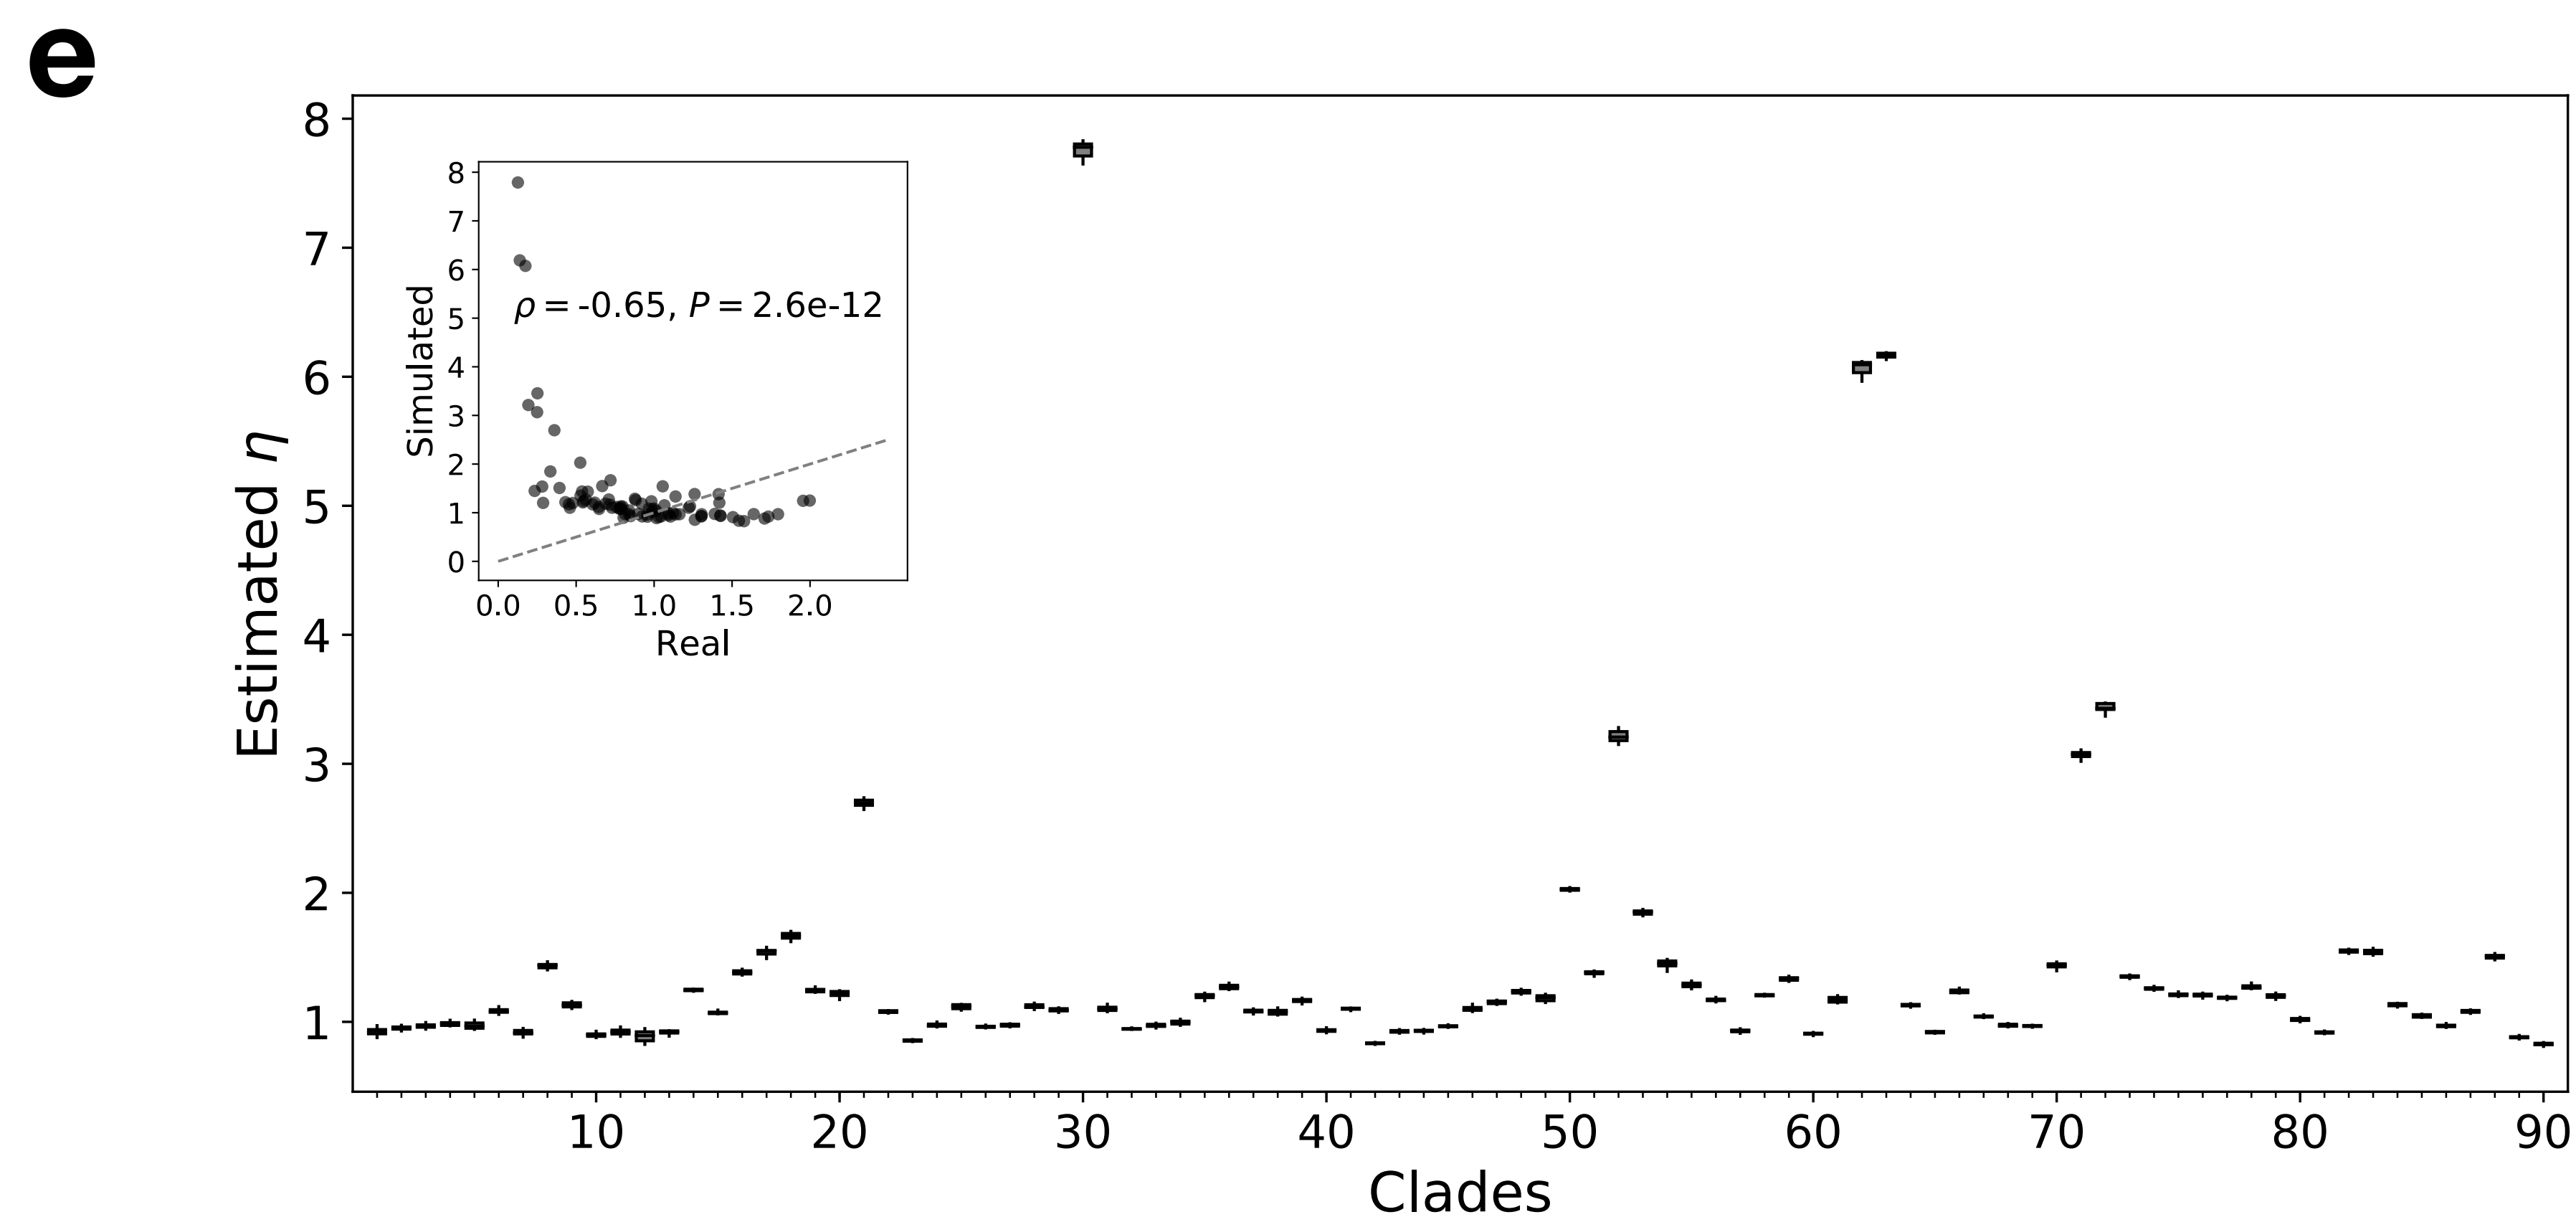

**Figure S3**

**a**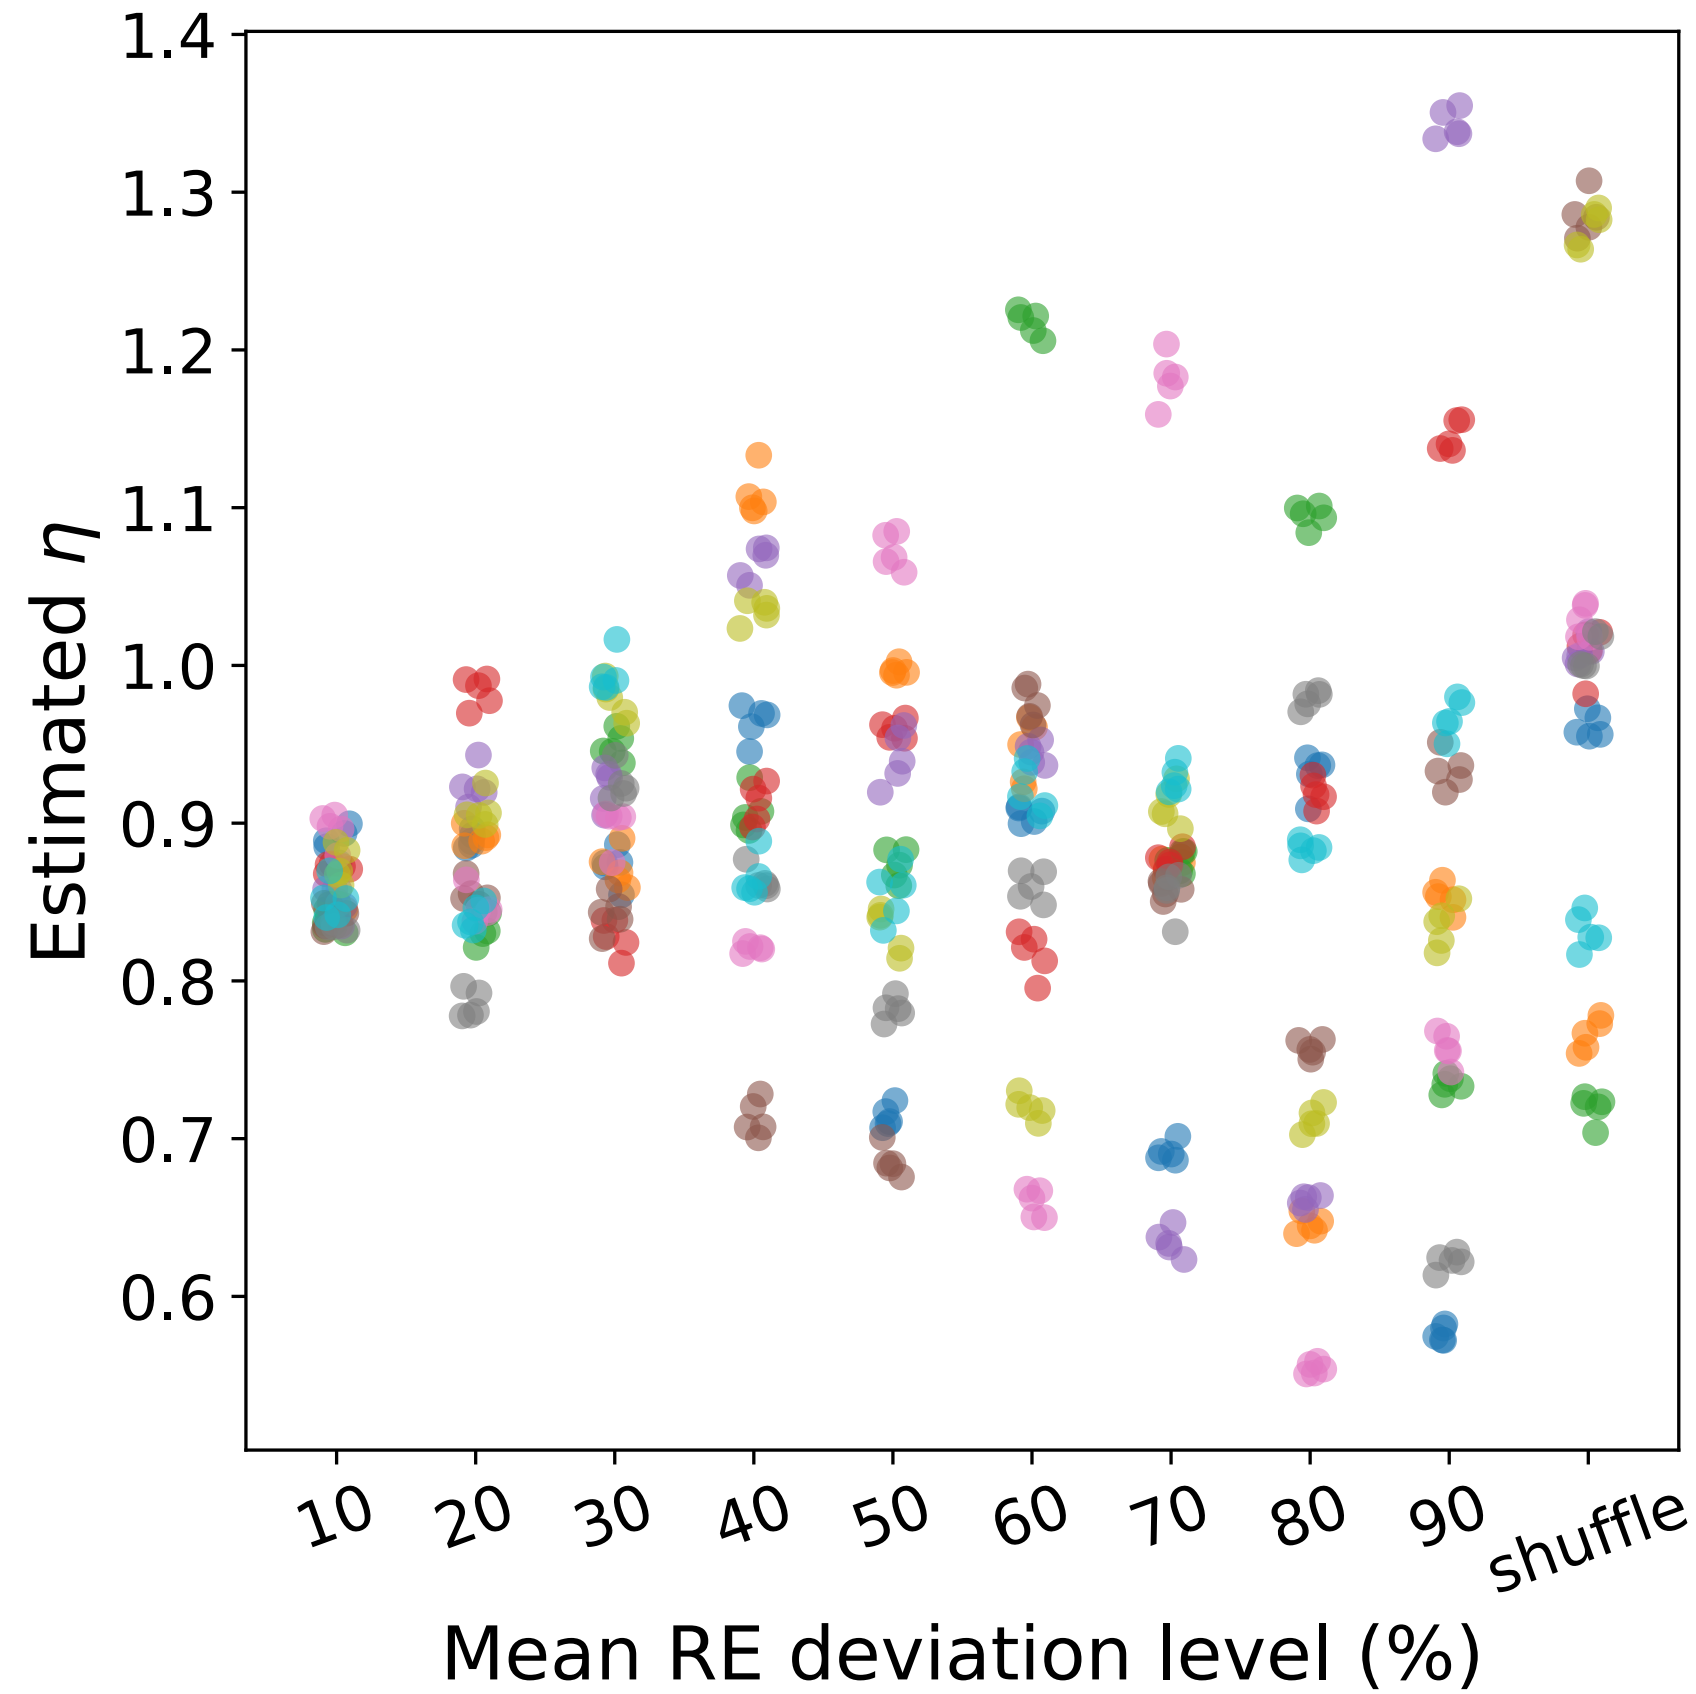**b**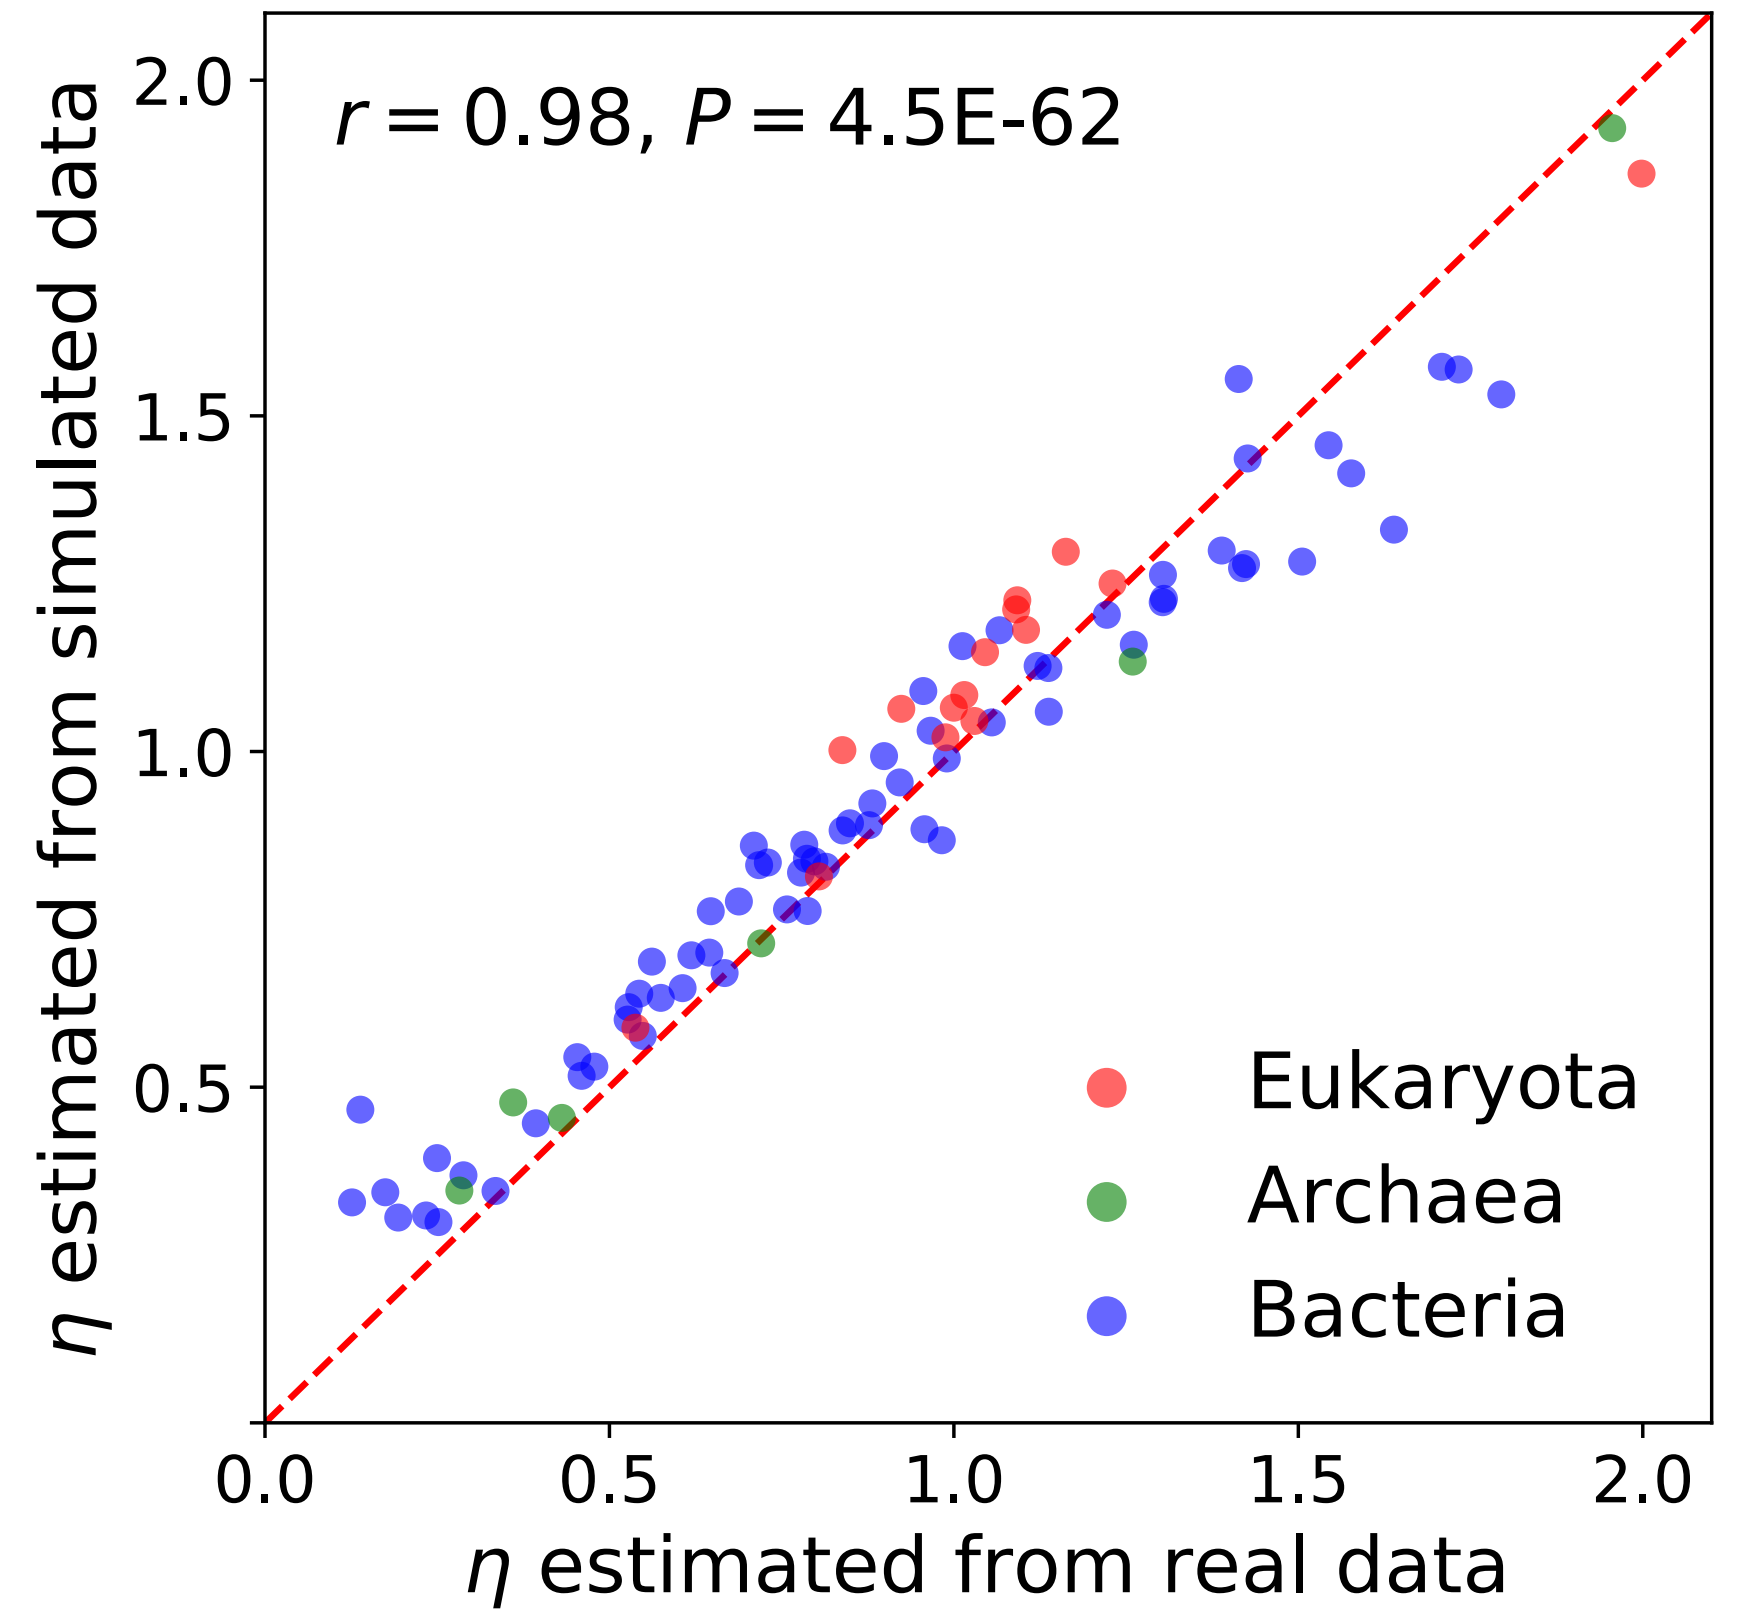**Figure S4**



**a**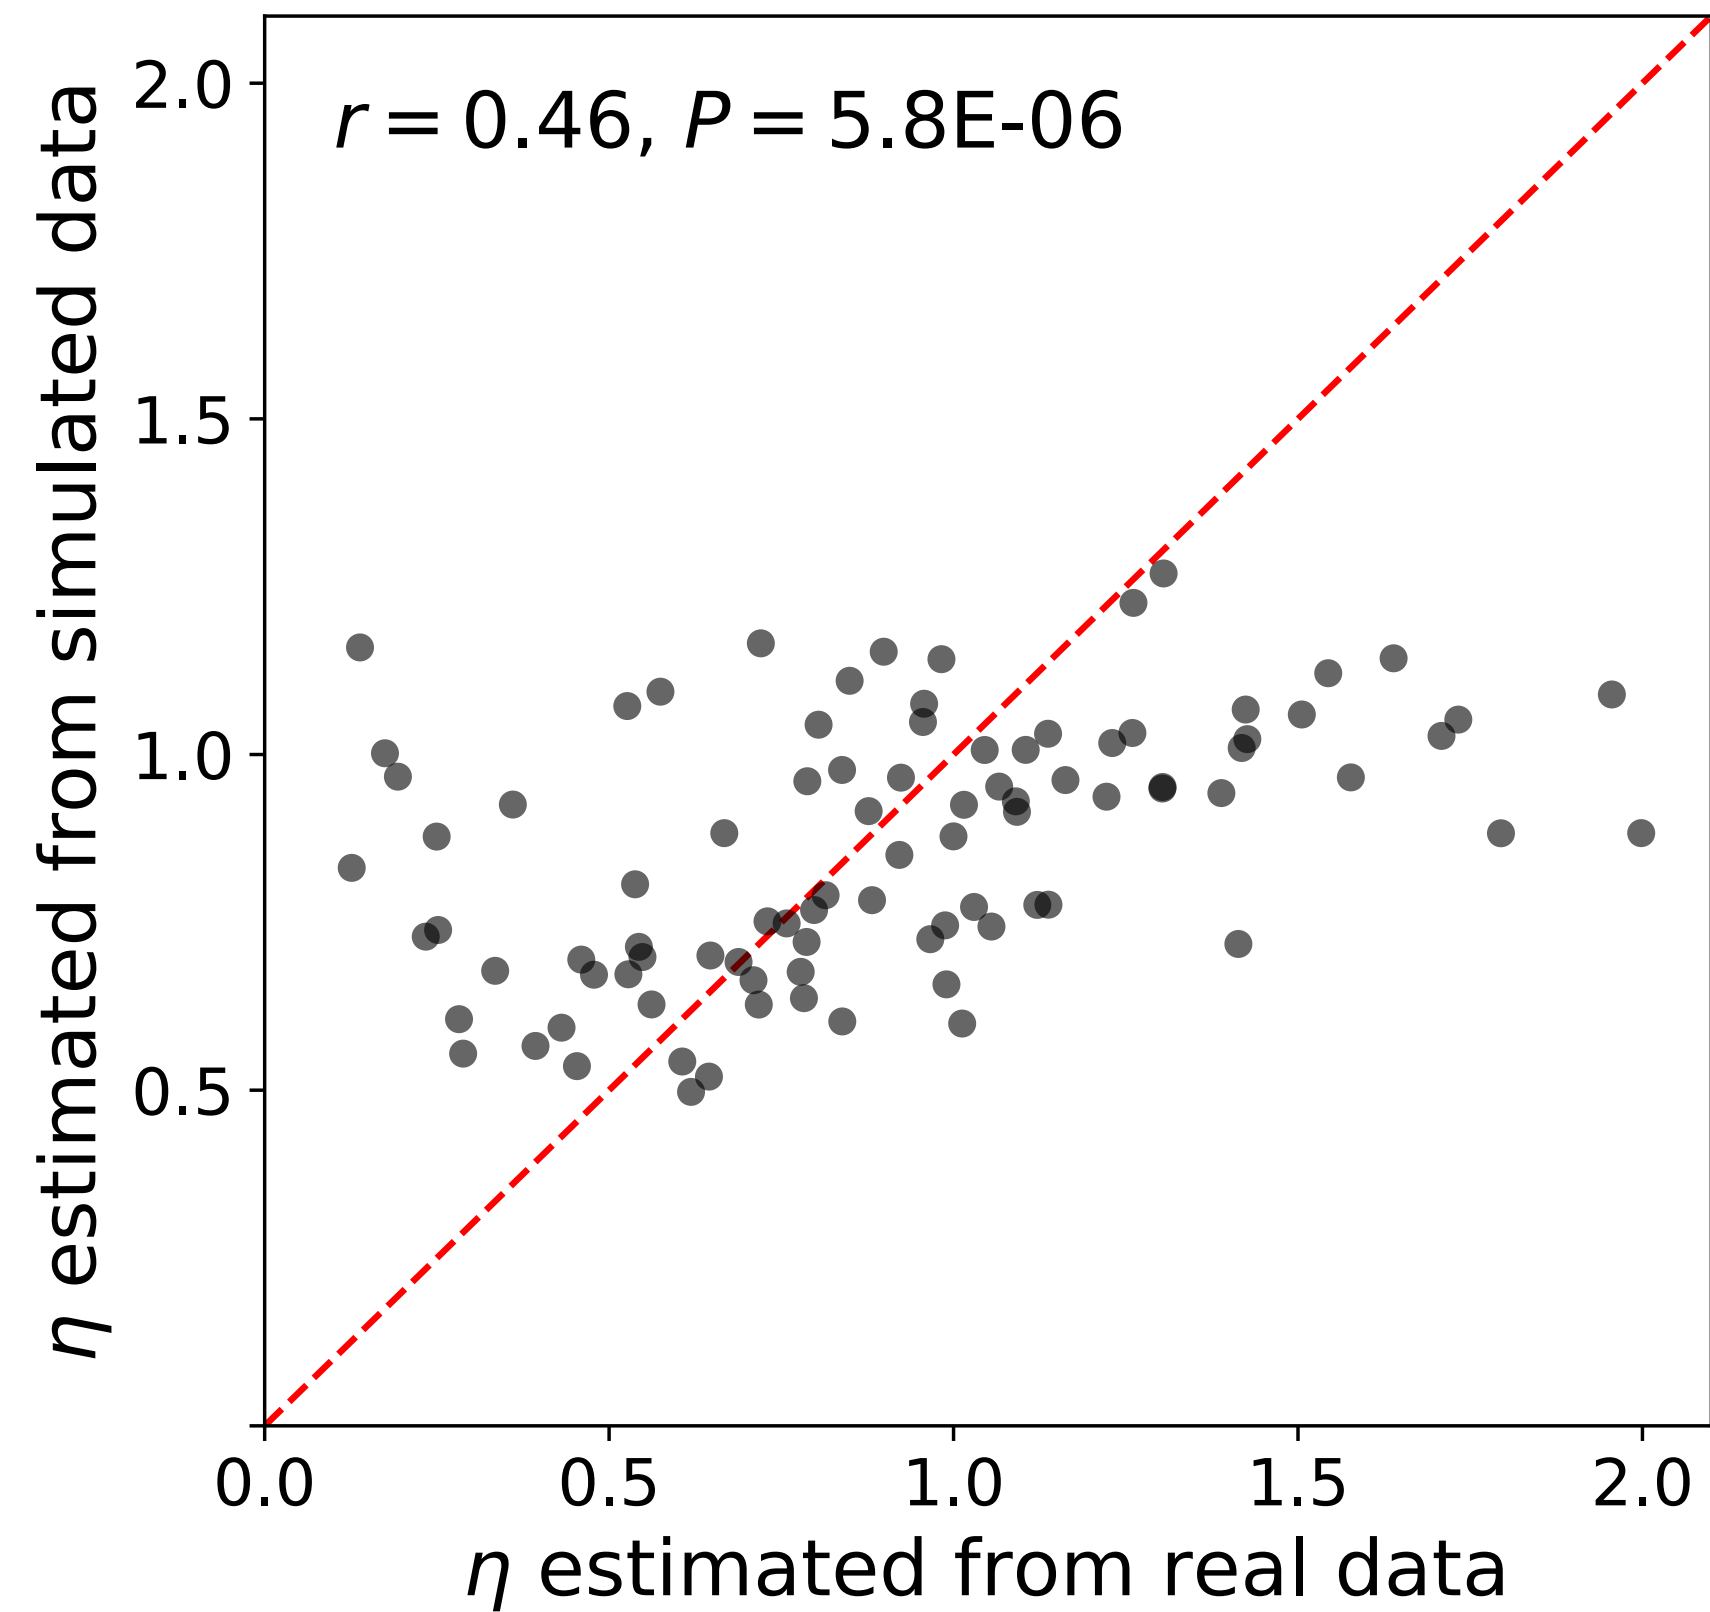**b**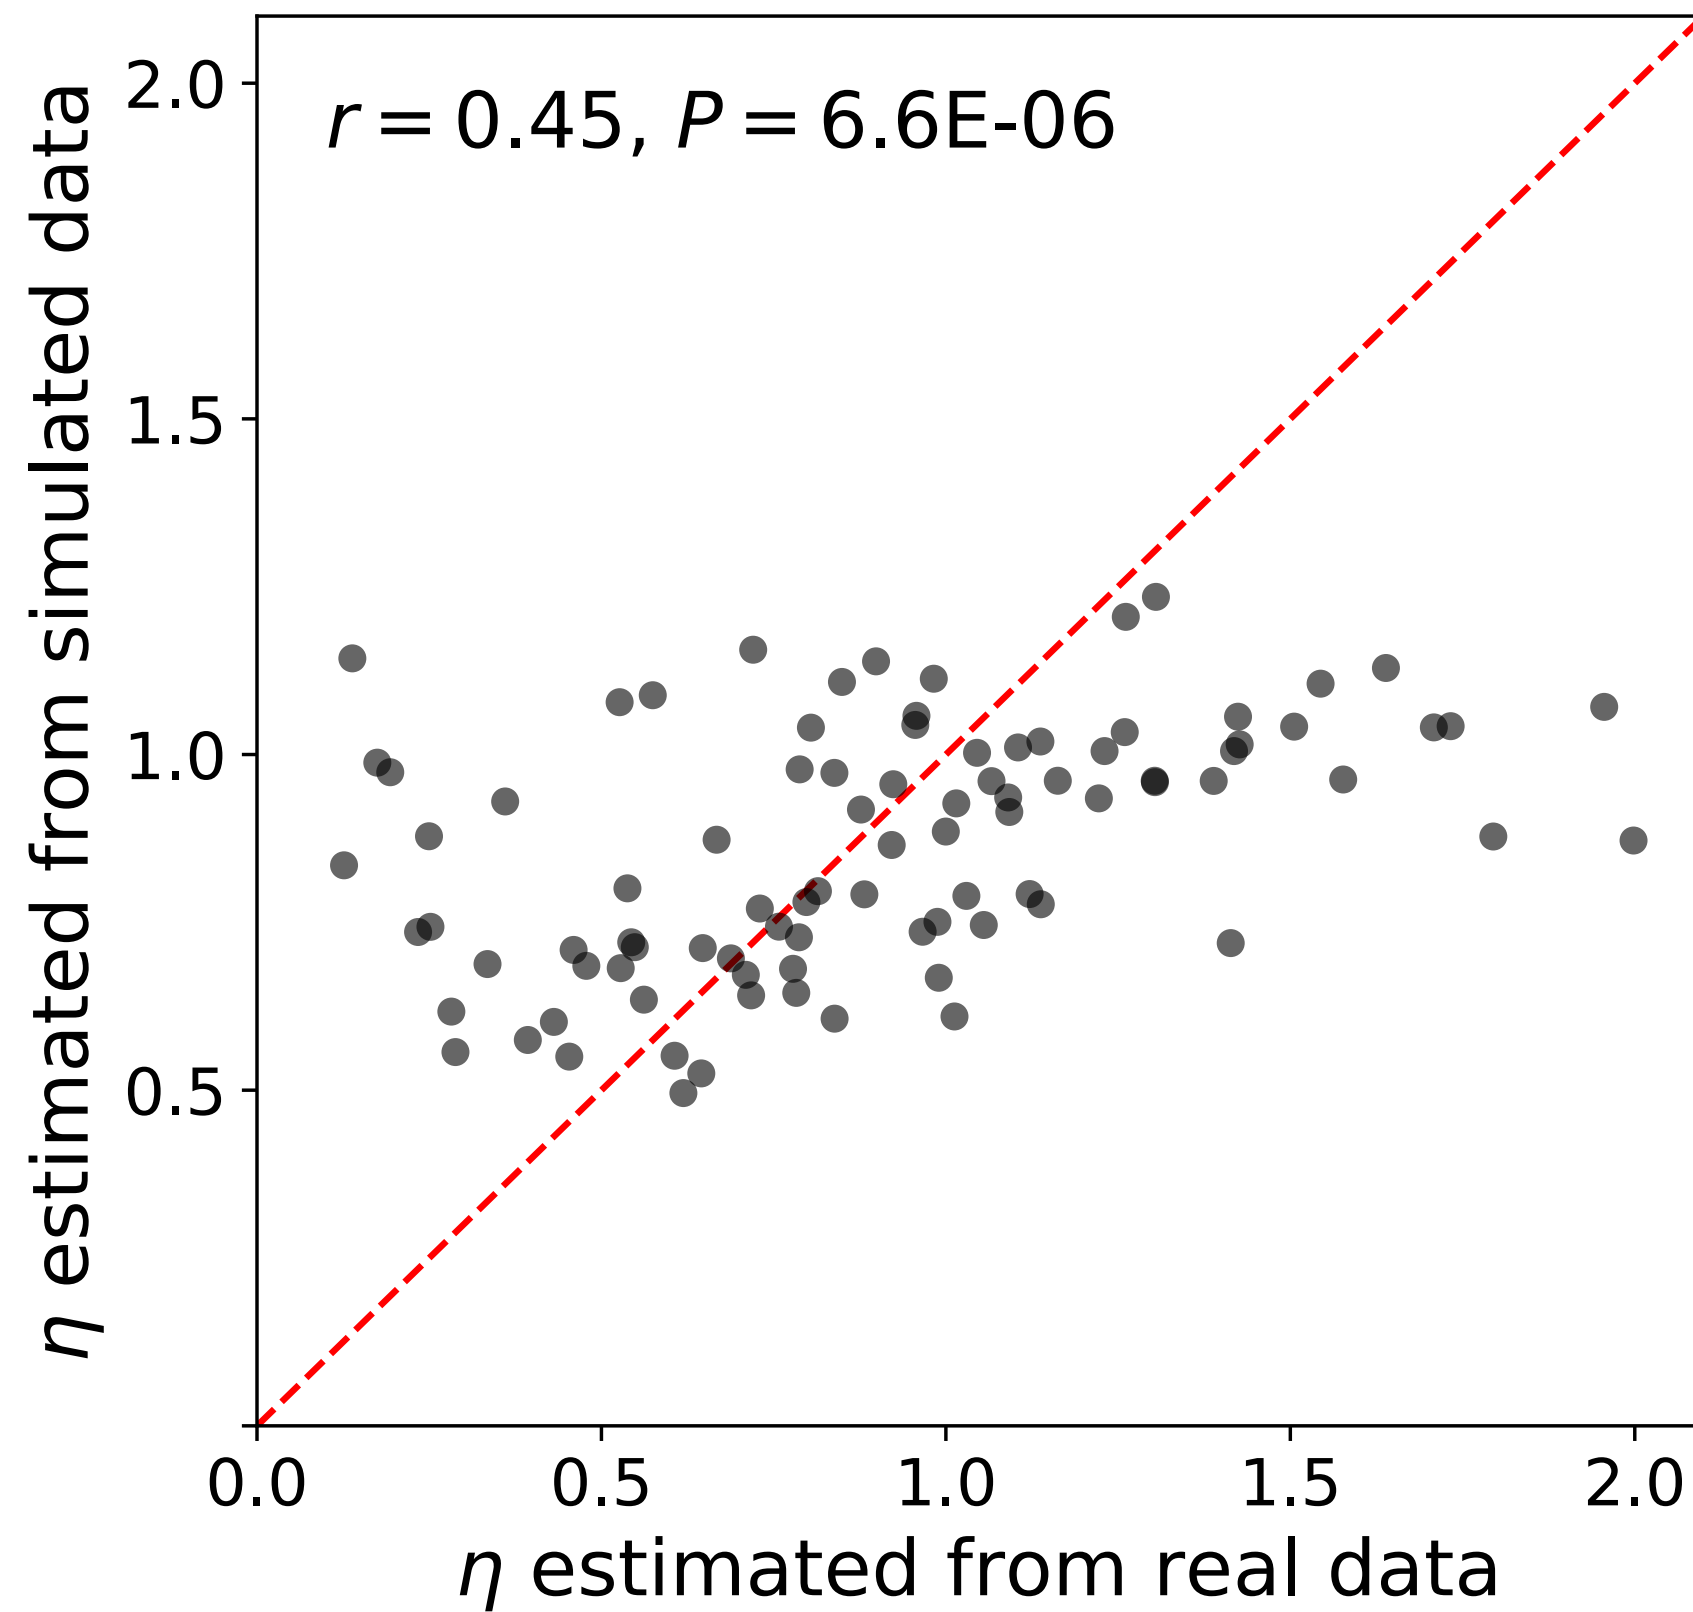**Figure S5**

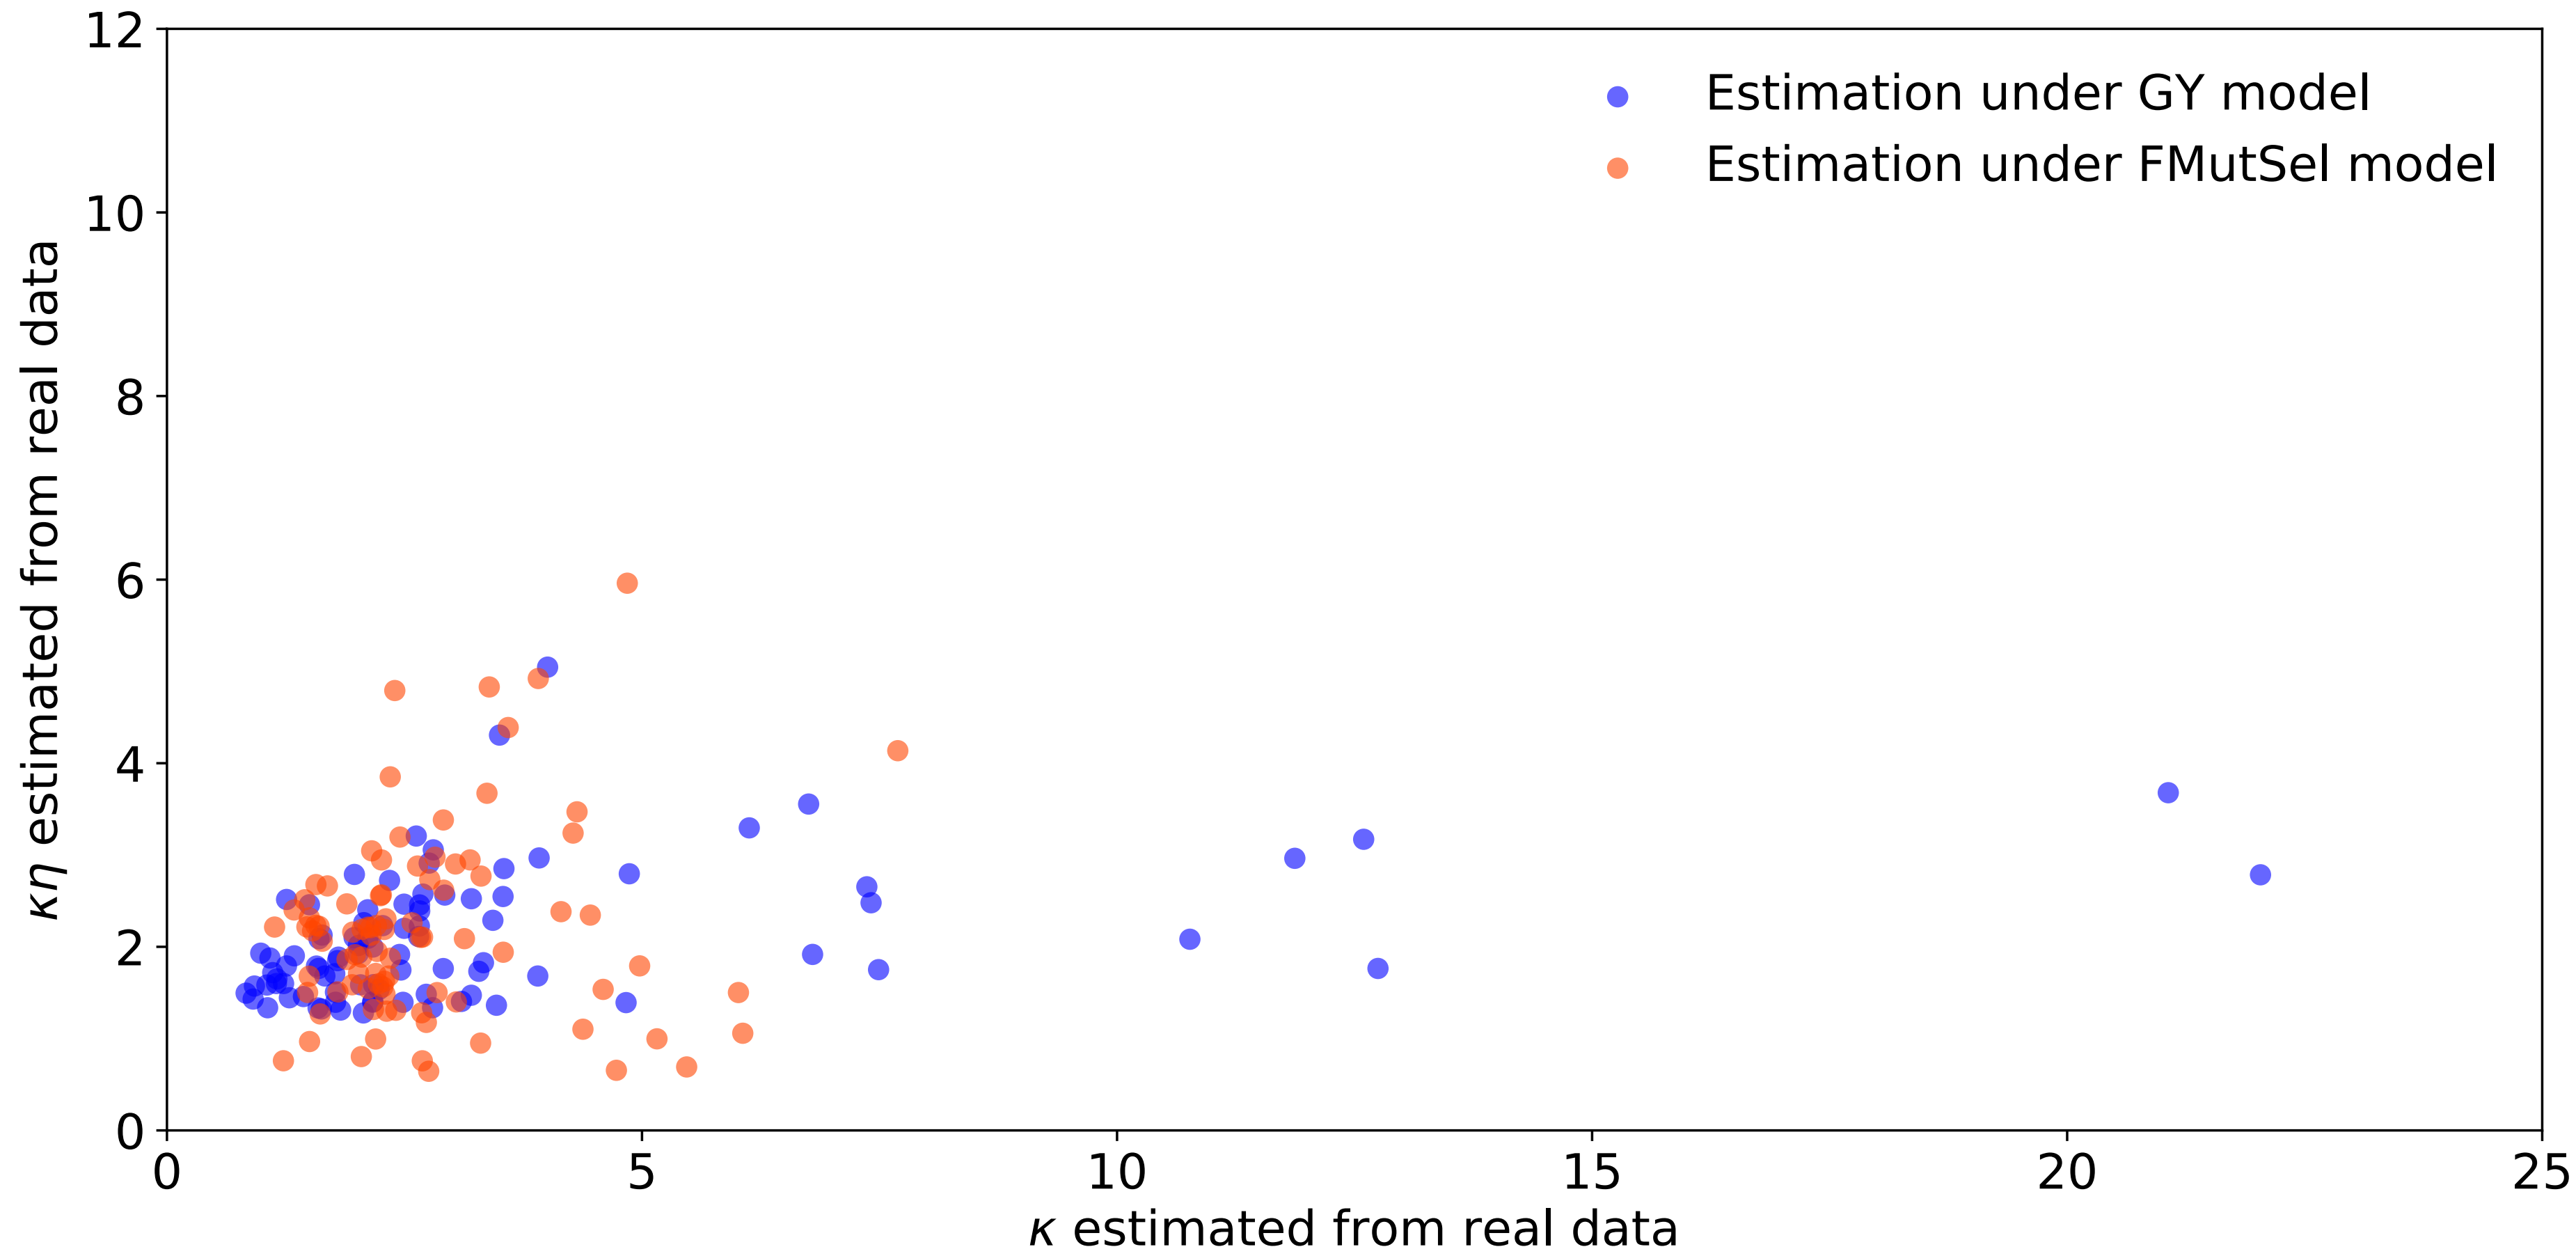

**Figure S6**

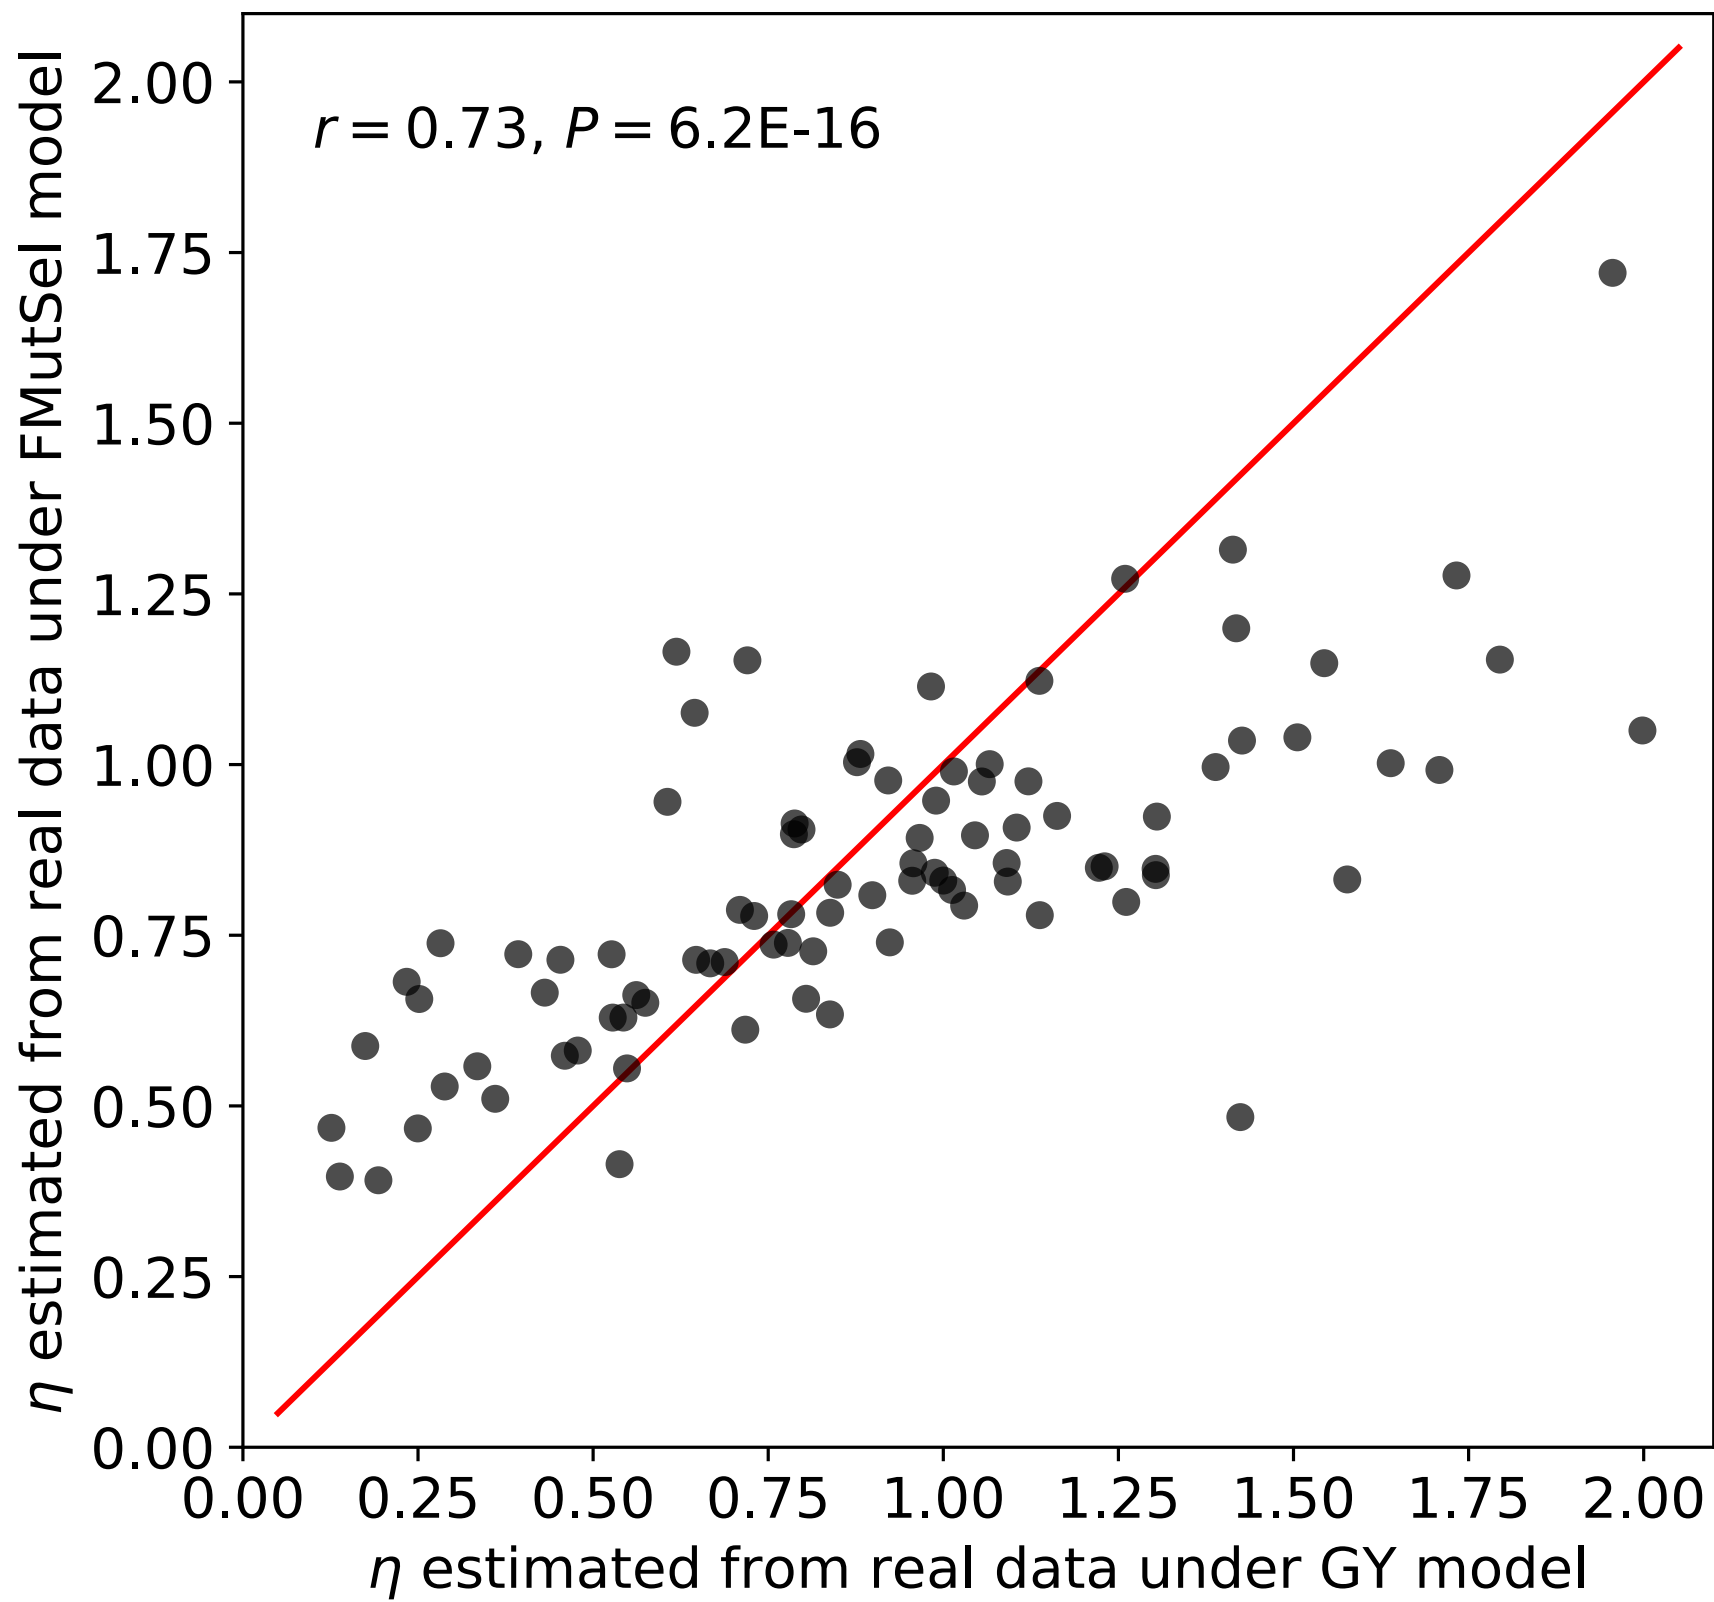

**Figure S7**

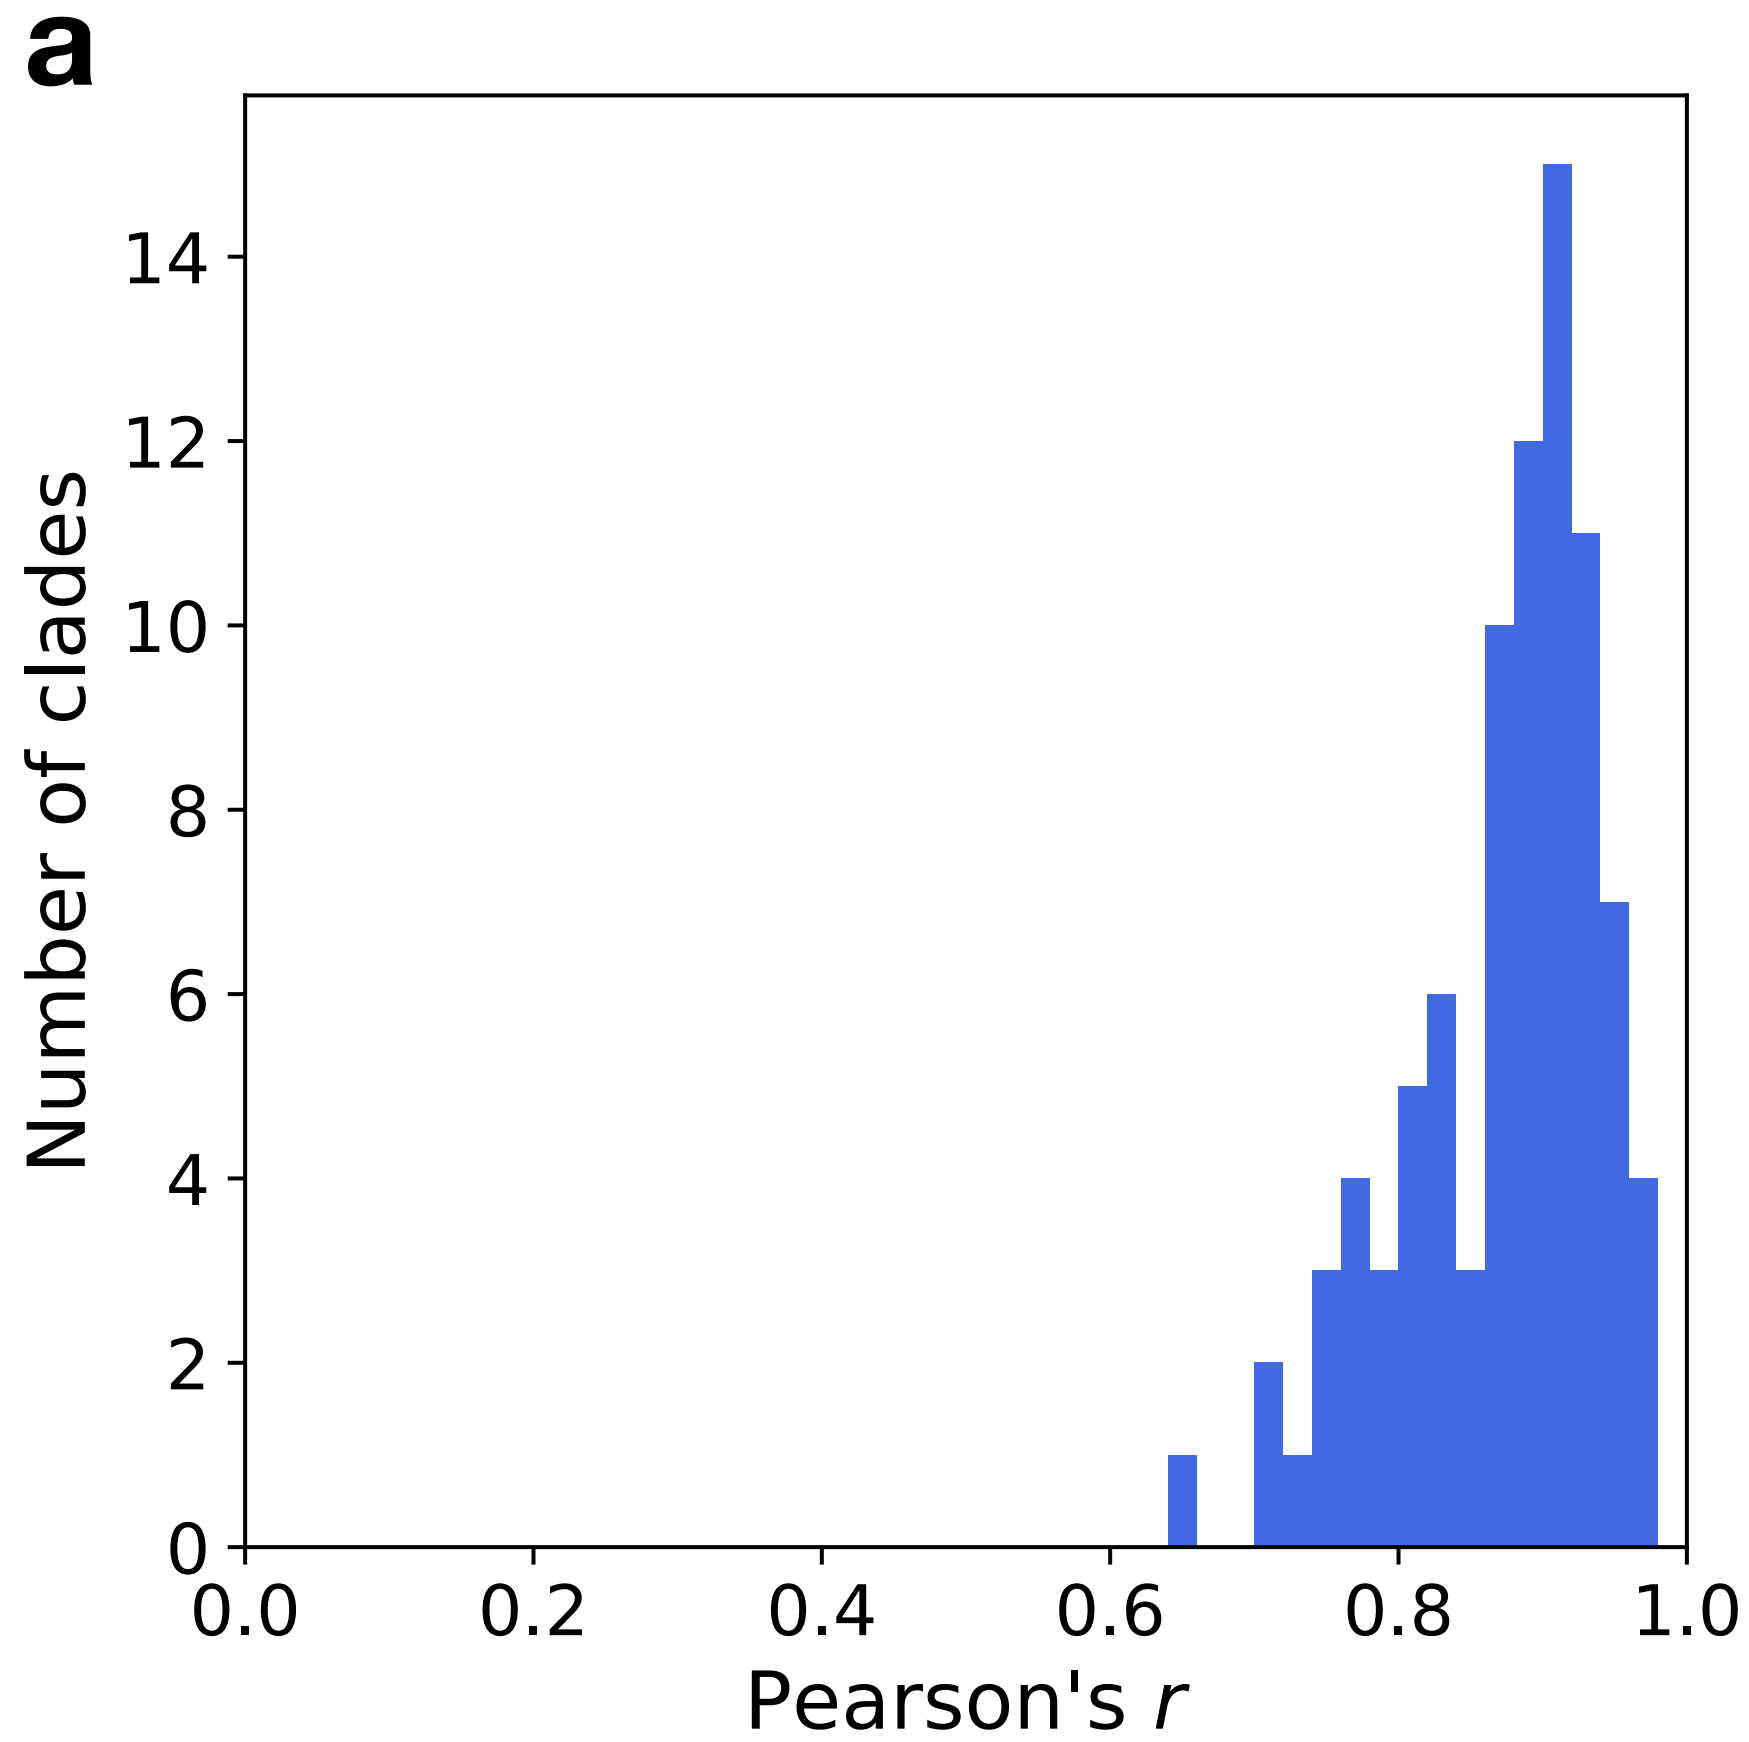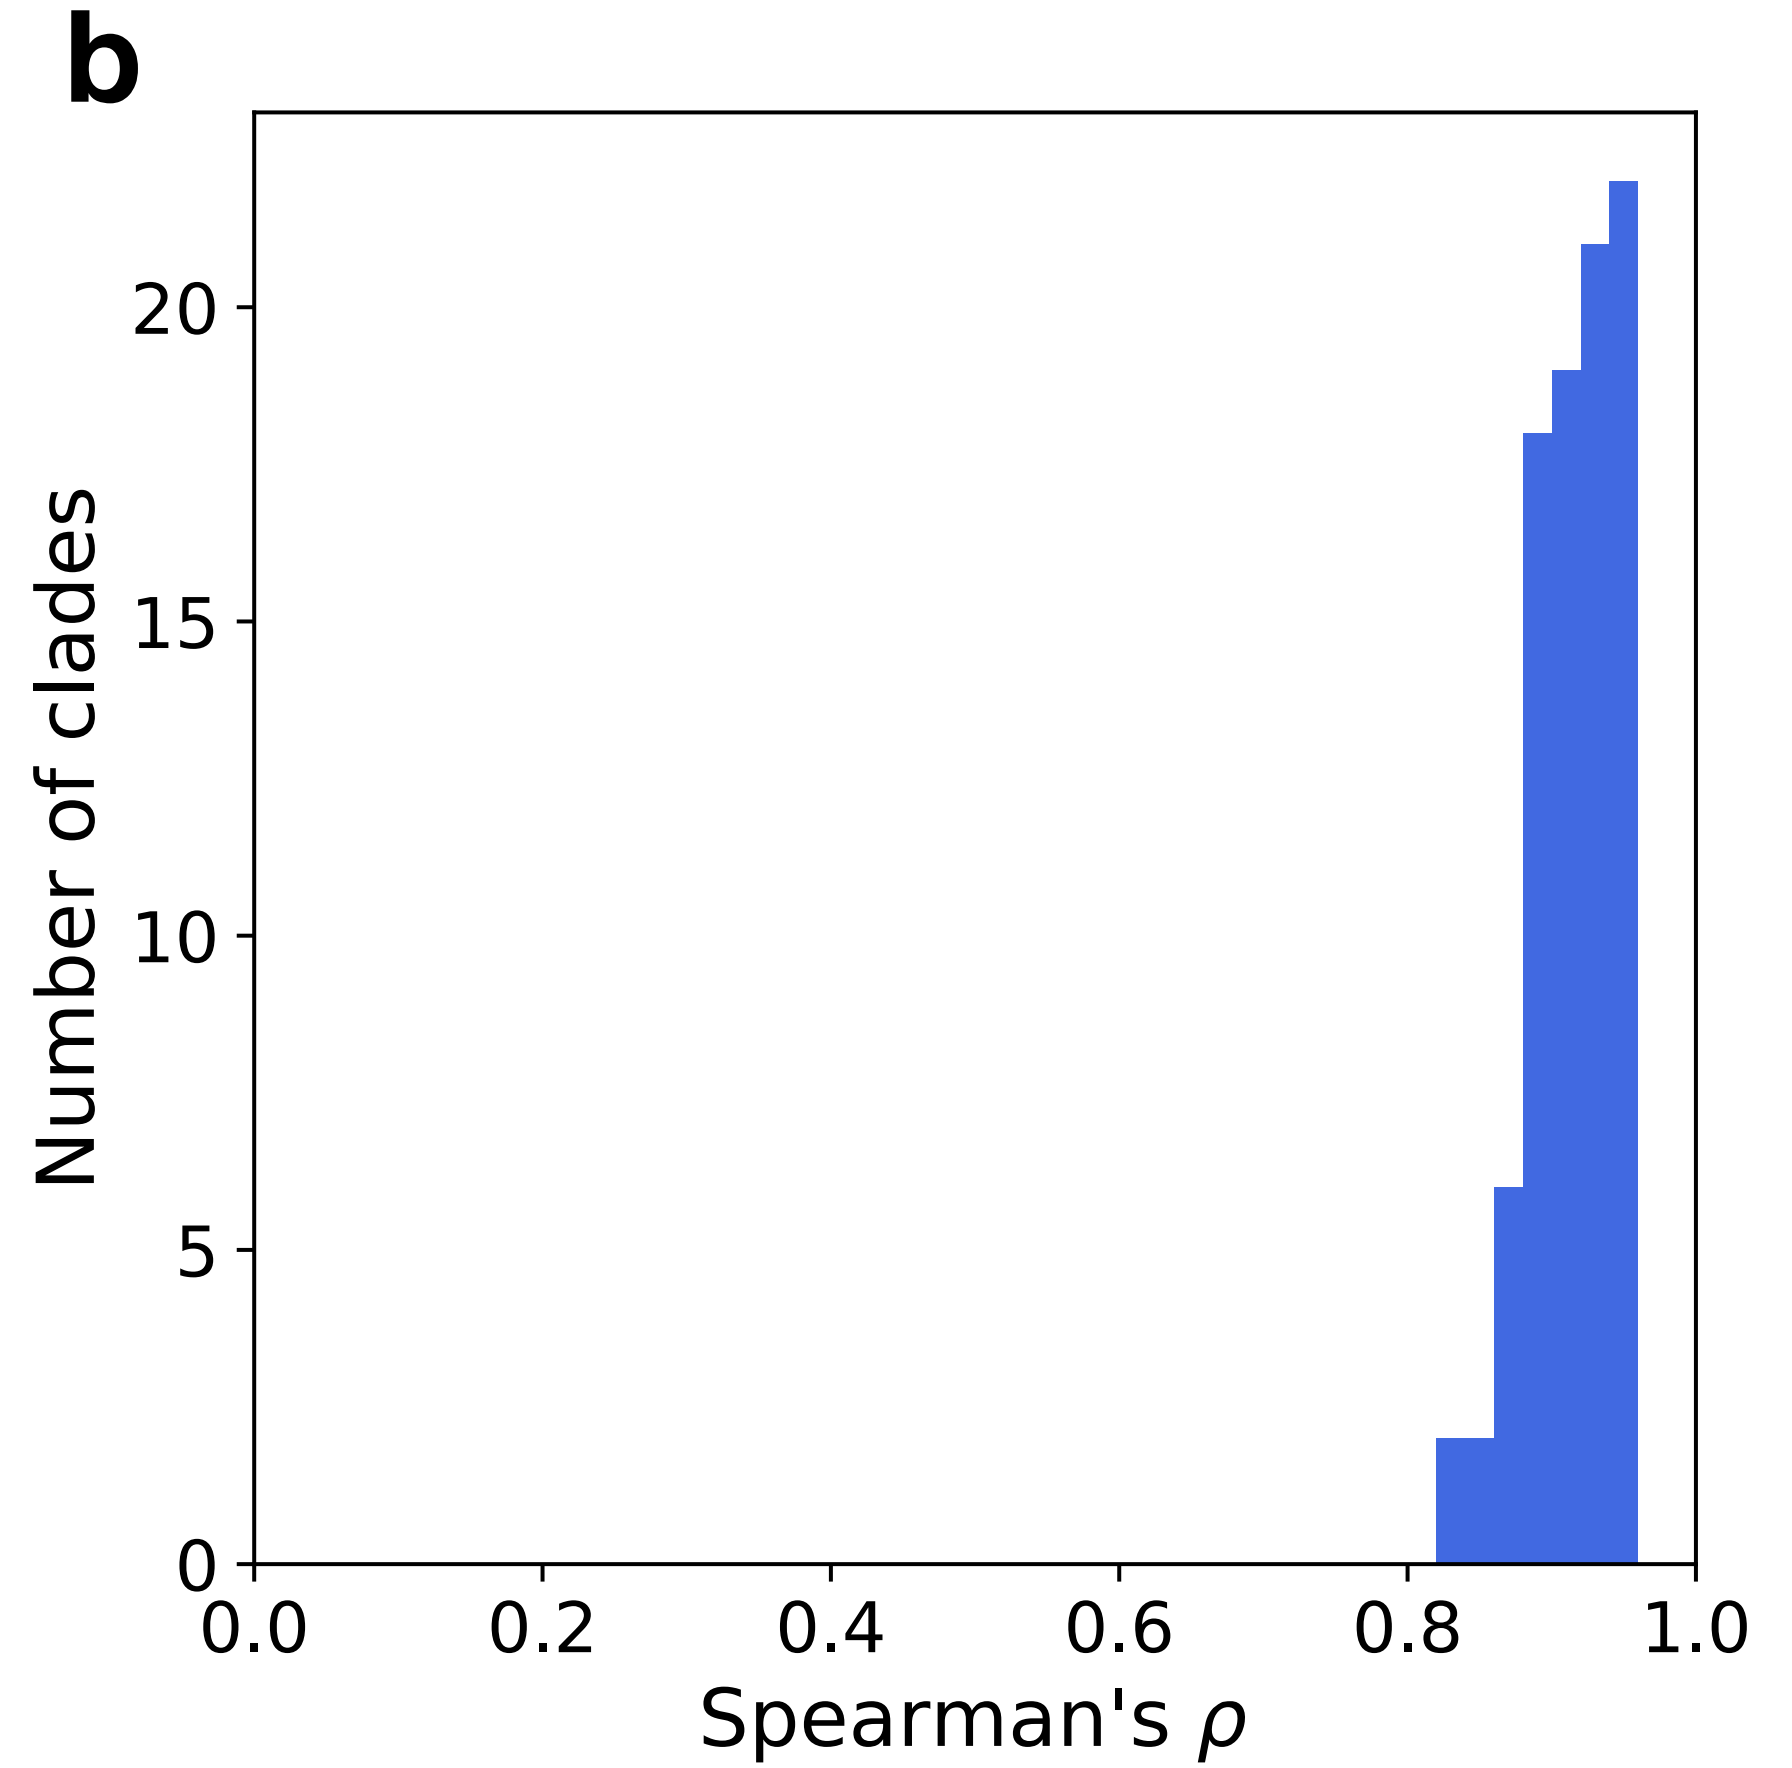

**Figure S8**

Table S1. Taxon compositions, data sources and estimated  $\eta$  values of all 90 clades for which  $\eta$ 's are estimated. The order and indexing are consistent with those in figures.

| Clade name | Domain          | $\eta$ estimation | Taxon 1 (designated in shuffling test) | Taxon 2                                                                | Data source                                                                        |                                                                                             |
|------------|-----------------|-------------------|----------------------------------------|------------------------------------------------------------------------|------------------------------------------------------------------------------------|---------------------------------------------------------------------------------------------|
| 1          | 03_HsaMmu       | Eukaryota         | 0.92                                   | <i>Homo sapiens</i>                                                    | <i>Macaca mulatta</i>                                                              | OrthoMaM v9 <sup>1</sup>                                                                    |
| 2          | 02_MusRat       | Eukaryota         | 1.09                                   | <i>Mus musculus</i>                                                    | <i>Rattus norvegicus</i>                                                           | OrthoMaM v9                                                                                 |
| 3          | 01_FcaCaf       | Eukaryota         | 1.16                                   | <i>Canis lupus familiaris</i>                                          | <i>Felis catus</i>                                                                 | OrthoMaM v9                                                                                 |
| 4          | 09_SarMon       | Eukaryota         | 1.09                                   | <i>Monodelphis domestica</i>                                           | <i>Sarcophilus harrisii</i>                                                        | OrthoMaM v9                                                                                 |
| 5          | 04_Gallus       | Eukaryota         | 0.84                                   | <i>Gallus gallus</i>                                                   | <i>Meleagris gallopavo</i>                                                         | Ensembl 84 <sup>2</sup>                                                                     |
| 6          | 12_fugu         | Eukaryota         | 1.00                                   | <i>Takifugu rubripes</i>                                               | <i>Tetraodon nigroviridis</i>                                                      | Ensembl 84                                                                                  |
| 7          | 05_Droso        | Eukaryota         | 1.03                                   | <i>Drosophila sechellia</i>                                            | <i>Drosophila simulans</i>                                                         | Flybase <sup>3</sup>                                                                        |
| 8          | 10_ants         | Eukaryota         | 0.54                                   | <i>Atta cephalotes</i>                                                 | <i>Solenopsis invicta</i>                                                          | Ensembl Metazoa <sup>4</sup>                                                                |
| 9          | 07_yeast        | Eukaryota         | 1.23                                   | <i>Saccharomyces cerevisiae</i>                                        | <i>Saccharomyces paradoxus</i>                                                     | <a href="http://www.saccharomycensustricto.org/">http://www.saccharomycensustricto.org/</a> |
| 10         | 14_Fusarium     | Eukaryota         | 0.80                                   | <i>Fusarium graminearum</i>                                            | <i>Fusarium pseudograminearum</i>                                                  | Ensembl Fungi <sup>5</sup>                                                                  |
| 11         | 08_Arab         | Eukaryota         | 1.10                                   | <i>Arabidopsis thaliana</i>                                            | <i>Arabidopsis lyrata</i>                                                          | Ensembl Plants <sup>6</sup>                                                                 |
| 12         | 15_Oryza        | Eukaryota         | 1.02                                   | <i>Oryza sativa Japonica</i>                                           | <i>Oryza glaberrima</i>                                                            | Ensembl Plants                                                                              |
| 13         | 16_Solanum      | Eukaryota         | 1.05                                   | <i>Solanum tuberosum</i>                                               | <i>Solanum lycopersicum</i>                                                        | Ensembl Plants                                                                              |
| 14         | 11_malaria      | Eukaryota         | 2.00                                   | <i>Plasmodium vivax</i>                                                | <i>Plasmodium knowlesi</i>                                                         | Ensembl Protists <sup>7</sup>                                                               |
| 15         | 13_Phytophthora | Eukaryota         | 0.99                                   | <i>Phytophthora infestans</i>                                          | <i>Phytophthora parasitica</i>                                                     | Ensembl Protists                                                                            |
| 16         | ATGC095         | Archaea           | 1.26                                   | <i>Vulcanisaeta moutnovskia</i> _768_28.GCF_000190315.1                | <i>Vulcanisaeta distributa</i> _DSM_14429.GCF_000148385.1                          | ATGC <sup>8</sup>                                                                           |
| 17         | ATGC130         | Archaea           | 0.28                                   | <i>Haloflexax_mediterranei</i> _ATCC_33500.GCF_000306765.2             | <i>Haloflexax_gibbonsii</i> .GCF_001190965.1                                       | ATGC                                                                                        |
| 18         | ATGC152         | Archaea           | 0.72                                   | <i>Thermococcus_guaymasensis</i> _DSM_11113.GCF_000816105.1            | <i>Thermococcus_AM4</i> .GCF_000151205.2                                           | ATGC                                                                                        |
| 19         | ATGC202         | Archaea           | 1.96                                   | <i>Methanothermobacter_thermautotrophicus_Delta_H</i> .GCF_000008645.1 | <i>Methanothermobacter_marburgensis_Marburg</i> .GCF_000145295.1                   | ATGC                                                                                        |
| 20         | ATGC277         | Archaea           | 0.43                                   | <i>Halorhabdus_utahensis</i> _DSM_12940.GCF_000023945.1                | <i>Halorhabdus_tiamatea_SARL4B</i> .GCF_000470655.1                                | ATGC                                                                                        |
| 21         | ATGC279         | Archaea           | 0.36                                   | <i>Thermococcus_sibiricus_MM_739</i> .GCF_000022545.1                  | <i>Thermococcus_2319xI</i> .GCF_001484685.1                                        | ATGC                                                                                        |
| 22         | ATGC001         | Bacteria          | 0.78                                   | <i>Shigella_flexneri_4c</i> .GCF_001579965.1                           | <i>Salmonella_enterica_enterica_serovar_Gallinarum_str_287_91</i> .GCF_000009525.1 | ATGC                                                                                        |
| 23         | ATGC013         | Bacteria          | 1.26                                   | <i>Streptococcus_parasanguinis_FW213</i> .GCF_000262145.1              | <i>Streptococcus_A12</i> .GCF_001587175.1                                          | ATGC                                                                                        |
| 24         | ATGC015         | Bacteria          | 1.39                                   | <i>Bacillus_vezelensis_FZB42</i> .GCF_000015785.1                      | <i>Bacillus_subtilis</i> .GCF_001604995.1                                          | ATGC                                                                                        |
| 25         | ATGC016         | Bacteria          | 0.76                                   | <i>Geobacillus_thermodenitrificans_NG80_2</i> .GCF_000015745.1         | <i>Geobacillus_GHH01</i> .GCF_000336445.1                                          | ATGC                                                                                        |
| 26         | ATGC021         | Bacteria          | 0.96                                   | <i>Chlamydia_trachomatis_E_SW3</i> .GCF_000304495.1                    | <i>Chlamydia_muridarum</i> .GCF_000772145.1                                        | ATGC                                                                                        |
| 27         | ATGC022         | Bacteria          | 0.90                                   | <i>Chlamydia_psittaci_GR9</i> .GCF_000298415.1                         | <i>Chlamydia_felis_Fe_C_56</i> .GCF_000009945.1                                    | ATGC                                                                                        |
| 28         | ATGC028         | Bacteria          | 0.64                                   | <i>Mycobacterium_vanbaalenii_PYR_1</i> .GCF_000015305.1                | <i>Mycobacterium_gilvum_PYR_GCK</i> .GCF_000016365.1                               | ATGC                                                                                        |
| 29         | ATGC044         | Bacteria          | 0.79                                   | <i>Rickettsia_rickettsii_Morgan</i> .GCF_000831545.1                   | <i>Rickettsia_prowazekii_Rp22</i> .GCF_000022785.1                                 | ATGC                                                                                        |
| 30         | ATGC045         | Bacteria          | 0.13                                   | <i>Ehrlichia_ruminantium_Welgevonden</i> .GCF_000026005.1              | <i>Ehrlichia_HF</i> .GCF_000632845.1                                               | ATGC                                                                                        |
| 31         | ATGC050         | Bacteria          | 1.22                                   | <i>Helicobacter_pylori_26695_1CH</i> .GCF_000829135.1                  | <i>Helicobacter_cetorum_MIT_99_5656</i> .GCF_000259275.1                           | ATGC                                                                                        |
| 32         | ATGC056         | Bacteria          | 1.42                                   | <i>Lactobacillus_rhamnosus_LOCK908</i> .GCF_000418495.1                | <i>Lactobacillus_paracasei_N1115</i> .GCF_000582665.1                              | ATGC                                                                                        |
| 33         | ATGC058         | Bacteria          | 1.64                                   | <i>Lactobacillus_amylovorus_GRL1118</i> .GCF_000194115.1               | <i>Lactobacillus_acidophilus_La_14</i> .GCF_000389675.2                            | ATGC                                                                                        |
| 34         | ATGC069         | Bacteria          | 1.12                                   | <i>Corynebacterium_deserti_GIMN1_010</i> .GCF_001277995.1              | <i>Brevibacterium_flavum</i> .GCF_000987865.1                                      | ATGC                                                                                        |
| 35         | ATGC071         | Bacteria          | 0.48                                   | <i>Pseudomonas_parafulva</i> .GCF_000800255.1                          | <i>Pseudomonas_CCOS_191</i> .GCF_001007005.1                                       | ATGC                                                                                        |
| 36         | ATGC073         | Bacteria          | 0.56                                   | <i>Pseudomonas_stutzeri_DSM_4166</i> .GCF_000195105.1                  | <i>Pseudomonas_balearica_DSM_6083</i> .GCF_000818015.1                             | ATGC                                                                                        |
| 37         | ATGC075         | Bacteria          | 0.97                                   | <i>Pseudomonas_syringae_actinidiae_ICMP_18884</i> .GCF_000648735.2     | <i>Pseudomonas_cichorii_JBC1</i> .GCF_000517305.1                                  | ATGC                                                                                        |
| 38         | ATGC078         | Bacteria          | 0.65                                   | <i>Pseudomonas_chlororaphis</i> .GCF_001602135.1                       | <i>Pseudomonas_URMO17WK12_111</i> .GCF_001511755.1                                 | ATGC                                                                                        |
| 39         | ATGC099         | Bacteria          | 0.72                                   | <i>Pantoea_vagans_C9_1</i> .GCF_000148935.1                            | <i>Pantoea_rwandensis</i> .GCF_000759475.1                                         | ATGC                                                                                        |
| 40         | ATGC110         | Bacteria          | 1.43                                   | <i>Vibrio_harveyi</i> .GCF_001558435.1                                 | <i>Vibrio_EJY3</i> .GCF_000241385.1                                                | ATGC                                                                                        |
| 41         | ATGC111         | Bacteria          | 0.73                                   | <i>Aeromonas_veronii_B565</i> .GCF_000204115.1                         | <i>Aeromonas_hydrophila_4AK4</i> .GCF_000512185.1                                  | ATGC                                                                                        |
| 42         | ATGC112         | Bacteria          | 1.54                                   | <i>Vibrio_fischeri_ES114</i> .GCF_000011805.1                          | <i>Allivibrio_wodanis</i> .GCF_000953695.1                                         | ATGC                                                                                        |
| 43         | ATGC117         | Bacteria          | 1.30                                   | <i>Aggregatibacter_aphrophilus</i> .GCF_001262035.1                    | <i>Aggregatibacter_actinomycetemcomitans_ANH9381</i> .GCF_000241025.1              | ATGC                                                                                        |
| 44         | ATGC120         | Bacteria          | 1.30                                   | <i>Shewanella_putrefaciens_CN_32</i> .GCF_000016585.1                  | <i>Shewanella_MR_4</i> .GCF_000014685.1                                            | ATGC                                                                                        |
| 45         | ATGC127         | Bacteria          | 1.14                                   | <i>Yersinia_ruckeri</i> .GCF_000964565.1                               | <i>Yersinia_pestis_biovar_Medievalis_Harbin_35</i> .GCF_000186725.1                | ATGC                                                                                        |
| 46         | ATGC134         | Bacteria          | 0.46                                   | <i>Xanthomonas_oryzae_oryzicola</i> .GCF_001042795.1                   | <i>Xanthomonas_campestris_campestris_str_8004</i> .GCF_000012105.1                 | ATGC                                                                                        |
| 47         | ATGC136         | Bacteria          | 1.07                                   | <i>Ochrobactrum_anthropi_ATCC_49188</i> .GCF_000017405.1               | <i>Brucella_pinnipedialis_B2_94</i> .GCF_000221005.1                               | ATGC                                                                                        |
| 48         | ATGC138         | Bacteria          | 0.98                                   | <i>Francisella_tularensis_holarctica_LVS</i> .GCF_000009245.1          | <i>Francisella_noatunensis_orientalis_FNO24</i> .GCF_001042545.1                   | ATGC                                                                                        |
| 49         | ATGC143         | Bacteria          | 0.92                                   | <i>Campylobacter_jejuni</i> .GCF_001506225.1                           | <i>Campylobacter_coli_RM5611</i> .GCF_000583795.1                                  | ATGC                                                                                        |
| 50         | ATGC145         | Bacteria          | 0.53                                   | <i>Borrelia_turicatae_91E135</i> .GCF_000012085.1                      | <i>Borrelia_duttonii_Ly</i> .GCF_000019685.1                                       | ATGC                                                                                        |
| 51         | ATGC146         | Bacteria          | 1.41                                   | <i>Thermotoga_neapolitana_DSM_4359</i> .GCF_000018945.1                | <i>Thermotoga_maritima_MSB8</i> .GCF_000978555.1                                   | ATGC                                                                                        |
| 52         | ATGC155         | Bacteria          | 0.19                                   | <i>Buchnera_aphidicola_G002_Myzus_persicae</i> .GCF_000521565.1        | <i>Buchnera_aphidicola_Ak_Acyrtosiphon_kondoi</i> .GCF_000225445.1                 | ATGC                                                                                        |
| 53         | ATGC159         | Bacteria          | 0.33                                   | <i>Propionibacterium_avidum_44067</i> .GCF_000367205.1                 | <i>Propionibacterium_aces_ATCC_11828</i> .GCF_000231215.1                          | ATGC                                                                                        |
| 54         | ATGC169         | Bacteria          | 0.23                                   | <i>Thermus_scotoductus_SA_01</i> .GCF_000187005.1                      | <i>Thermus_CCB_US3_UF1</i> .GCF_000236585.1                                        | ATGC                                                                                        |
| 55         | ATGC171         | Bacteria          | 0.88                                   | <i>Thermoanaerobacter_kivui</i> .GCF_000763575.1                       | <i>Thermoanaerobacter_italicus_Ab9</i> .GCF_000025645.1                            | ATGC                                                                                        |

|    |         |          |      |                                                               |                                                                    |      |
|----|---------|----------|------|---------------------------------------------------------------|--------------------------------------------------------------------|------|
| 56 | ATGC173 | Bacteria | 0.45 | Rhodopseudomonas_palustris_TIE_1.GCF_000020445.1              | Rhodopseudomonas_palustris_BisB5.GCF_000013685.1                   | ATGC |
| 57 | ATGC178 | Bacteria | 0.85 | Prochlorococcus_marinus_pastoris_str_CCMP1986.GCF_000011465.1 | Prochlorococcus_marinus_MIT_9515.GCF_000015665.1                   | ATGC |
| 58 | ATGC181 | Bacteria | 1.42 | Caldicellulosiruptor_saccharolyticus_DSM_8903.GCF_000016545.1 | Caldicellulosiruptor_bescii_DSM_6725.GCF_000022325.1               | ATGC |
| 59 | ATGC182 | Bacteria | 1.14 | Thermoanaerobacterium_xylanolyticum_LX_11.GCF_000189775.2     | Thermoanaerobacterium_thermosaccharolyticum_M0795.GCF_000328545.1  | ATGC |
| 60 | ATGC186 | Bacteria | 1.51 | Sulfurospirillum_deleyianum_DSM_6946.GCF_000024885.1          | Sulfurospirillum_barnesii_SES_3.GCF_000265295.1                    | ATGC |
| 61 | ATGC188 | Bacteria | 0.61 | Ralstonia_solanacearum.GCF_001299555.1                        | Ralstonia_mannitolilytica.GCF_000954135.1                          | ATGC |
| 62 | ATGC201 | Bacteria | 0.17 | Candidatus_Bartonella_ancashi.GCF_001281405.1                 | Bartonella_clarridgeiae_73.GCF_000253015.1                         | ATGC |
| 63 | ATGC223 | Bacteria | 0.14 | Blattabacterium_Nauphoeta_cinerea.GCF_000471965.1             | Blattabacterium_Mastotermes_darwiniensis_str_MADAR.GCF_000233435.1 | ATGC |
| 64 | ATGC232 | Bacteria | 0.80 | Hypomicrobium_denitrificans_ATCC_51888.GCF_000143145.1        | Hypomicrobium_denitrificans_1NES1.GCF_000230975.2                  | ATGC |
| 65 | ATGC235 | Bacteria | 1.73 | Pseudoalteromonas_haloplanktis_TAC125.GCF_000026085.1         | Pseudoalteromonas_Bsw20308.GCF_000310105.2                         | ATGC |
| 66 | ATGC239 | Bacteria | 0.55 | Edwardsiella_tarda.GCF_001011055.1                            | Edwardsiella_ictaluri_93_146.GCF_000022885.2                       | ATGC |
| 67 | ATGC242 | Bacteria | 1.01 | Janthinobacterium_Marseille.GCF_000013625.1                   | Hermiimonas_arsenicoxydans.GCF_000026125.1                         | ATGC |
| 68 | ATGC243 | Bacteria | 0.81 | Exiguobacterium_sibiricum_255_15.GCF_000019905.1              | Exiguobacterium_MH3.GCF_000496635.1                                | ATGC |
| 69 | ATGC244 | Bacteria | 1.30 | Psychrobacter_arcticus_273_4.GCF_000012305.1                  | Psychrobacter_alimentarius.GCF_001606025.1                         | ATGC |
| 70 | ATGC246 | Bacteria | 0.57 | Candidatus_Liberibacter_asiaticus_psy62.GCF_000023765.2       | Candidatus_Liberibacter_africanus_PTSAPSY.GCF_001021085.1          | ATGC |
| 71 | ATGC258 | Bacteria | 0.25 | Dictyoglomus_turgidum_DSM_6724.GCF_000021645.1                | Dictyoglomus_thermophilum_H_6_12.GCF_000020965.1                   | ATGC |
| 72 | ATGC260 | Bacteria | 0.25 | Candidatus_Arthromitus_SFB_rat_Yit.GCF_000283555.1            | Candidatus_Arthromitus_SFB_mouse_NL.GCF_000709435.1                | ATGC |
| 73 | ATGC301 | Bacteria | 0.53 | Pseudomonas_stutzeri_DSM_10701.GCF_000279165.1                | Pseudomonas_20_BN.GCF_000756775.1                                  | ATGC |
| 74 | ATGC309 | Bacteria | 0.88 | Campylobacter_subantarcticus_LMG_24377.GCF_000816305.1        | Campylobacter_peloridis_LMG_23910.GCF_000816785.1                  | ATGC |
| 75 | ATGC330 | Bacteria | 0.54 | Corynebacterium_singulare.GCF_000833575.1                     | Corynebacterium_aurimucosum_ATCC_700975.GCF_000022905.1            | ATGC |
| 76 | ATGC332 | Bacteria | 0.62 | Corynebacterium_marinum_DSM_44953.GCF_000835165.1             | Corynebacterium_humireducens_NBRC_106098_DSM_45392.GCF_000819445.1 | ATGC |
| 77 | ATGC339 | Bacteria | 0.69 | Bordetella_holmesii_H558.GCF_000341485.2                      | Bordetella_avium_197N.GCF_000070465.1                              | ATGC |
| 78 | ATGC341 | Bacteria | 0.71 | Bifidobacterium_dentium_JCM_1195_DSM_20436.GCF_001042595.1    | Bifidobacterium_adolescentis.GCF_000817995.1                       | ATGC |
| 79 | ATGC352 | Bacteria | 0.29 | Xanthomonas_translucens_undulosa.GCF_001021935.1              | Xanthomonas_sacchari.GCF_000815185.1                               | ATGC |
| 80 | ATGC361 | Bacteria | 0.99 | Paenibacillus_sabinae_T27.GCF_000612505.1                     | Paenibacillus_durus.GCF_000756615.1                                | ATGC |
| 81 | ATGC369 | Bacteria | 0.96 | Carnobacterium_inhibens_gilichinskyi.GCF_000493735.1          | Carnobacterium_17_4.GCF_000195575.1                                | ATGC |
| 82 | ATGC371 | Bacteria | 0.67 | Fervidobacterium_pennivorans_DSM_9078.GCF_000235405.2         | Fervidobacterium_islandicum.GCF_000767275.2                        | ATGC |
| 83 | ATGC372 | Bacteria | 1.06 | Thermotoga_caldifontis_AZM44c09.GCF_000828655.1               | Pseudothermotoga_hypogea_DSM_11164_NBRC_106472.GCF_000504105.1     | ATGC |
| 84 | ATGC374 | Bacteria | 0.79 | Paenarthrobacter_aurescens_TC1.GCF_000014925.1                | Arthrobacter_ATCC_21022.GCF_001542565.1                            | ATGC |
| 85 | ATGC376 | Bacteria | 0.84 | Glutamicibacter_arilaitensis_Re117.GCF_000197735.1            | Glutamicibacter_arilaitensis.GCF_001302565.1                       | ATGC |
| 86 | ATGC389 | Bacteria | 1.79 | Dokdonia_MED134.GCF_000152925.2                               | Dokdonia_4H_3_7_5.GCF_000212355.1                                  | ATGC |
| 87 | ATGC393 | Bacteria | 0.78 | Collimonas_fungivorans.GCF_001584145.1                        | Collimonas_arenae.GCF_000786695.1                                  | ATGC |
| 88 | ATGC420 | Bacteria | 0.39 | Thioalkalivibrio_versutus.GCF_001020955.1                     | Thioalkalivibrio_K90mix.GCF_000025545.1                            | ATGC |
| 89 | ATGC428 | Bacteria | 1.71 | Cyclobacterium_marinum_DSM_745.GCF_000222485.1                | Cyclobacterium_amurskyense.GCF_001050135.1                         | ATGC |
| 90 | ATGC431 | Bacteria | 1.58 | Thioalkalimicrobium_cyclicum_ALM1.GCF_000214825.1             | Thioalkalimicrobium_aerophilum_AL3.GCF_000227665.2                 | ATGC |

<sup>1</sup> [http://www.orthomam.univ-montp2.fr/orthomam\\_v9/html/](http://www.orthomam.univ-montp2.fr/orthomam_v9/html/)

<sup>2</sup> <https://useast.ensembl.org/index.html>

<sup>3</sup> <https://flybase.org/>

<sup>4</sup> <https://metazoa.ensembl.org/index.html>

<sup>5</sup> <http://fungi.ensembl.org/index.html>

<sup>6</sup> <http://plants.ensembl.org/index.html>

<sup>7</sup> <http://protists.ensembl.org/index.html>

<sup>8</sup> <http://dmk-brain.ecn.uiowa.edu/ATGC/>
